# Supplementary material for: Insights into a surprising reaction: The microwave-assisted direct esterification of phosphinic acids
Source: Royal Society of Chemistry journal article supplement (doi:10.1039/c2ob06972e), 2012-01-01

1-Dodecyloxy-3,4-dimethyl-3-phospholene 1-oxide 31P

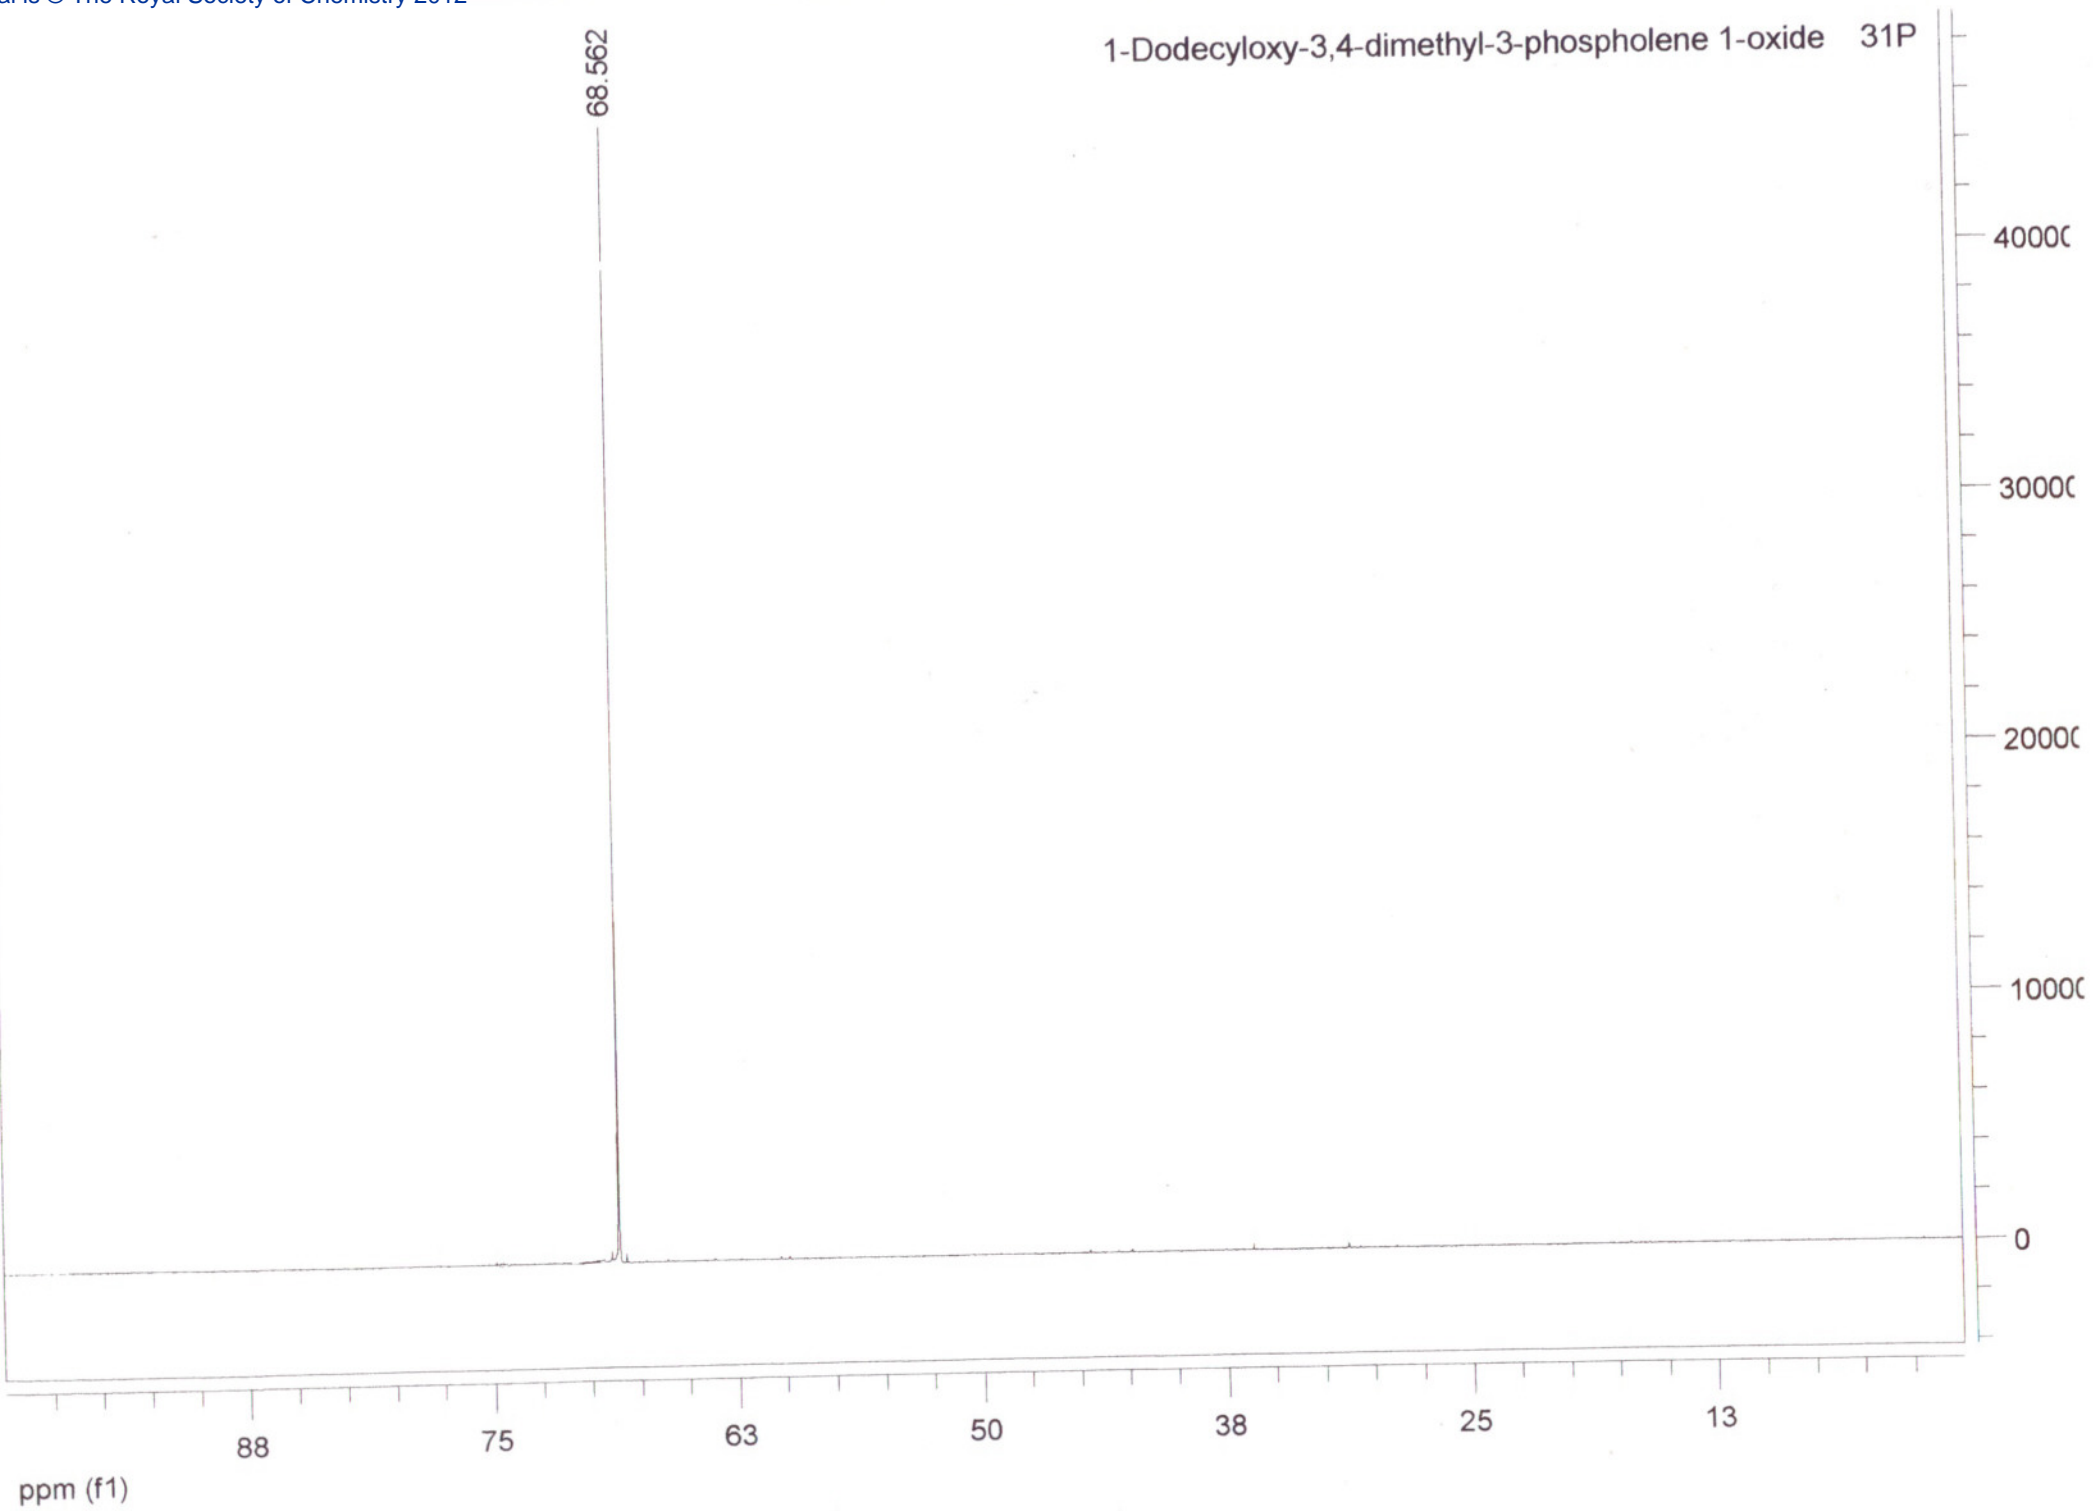

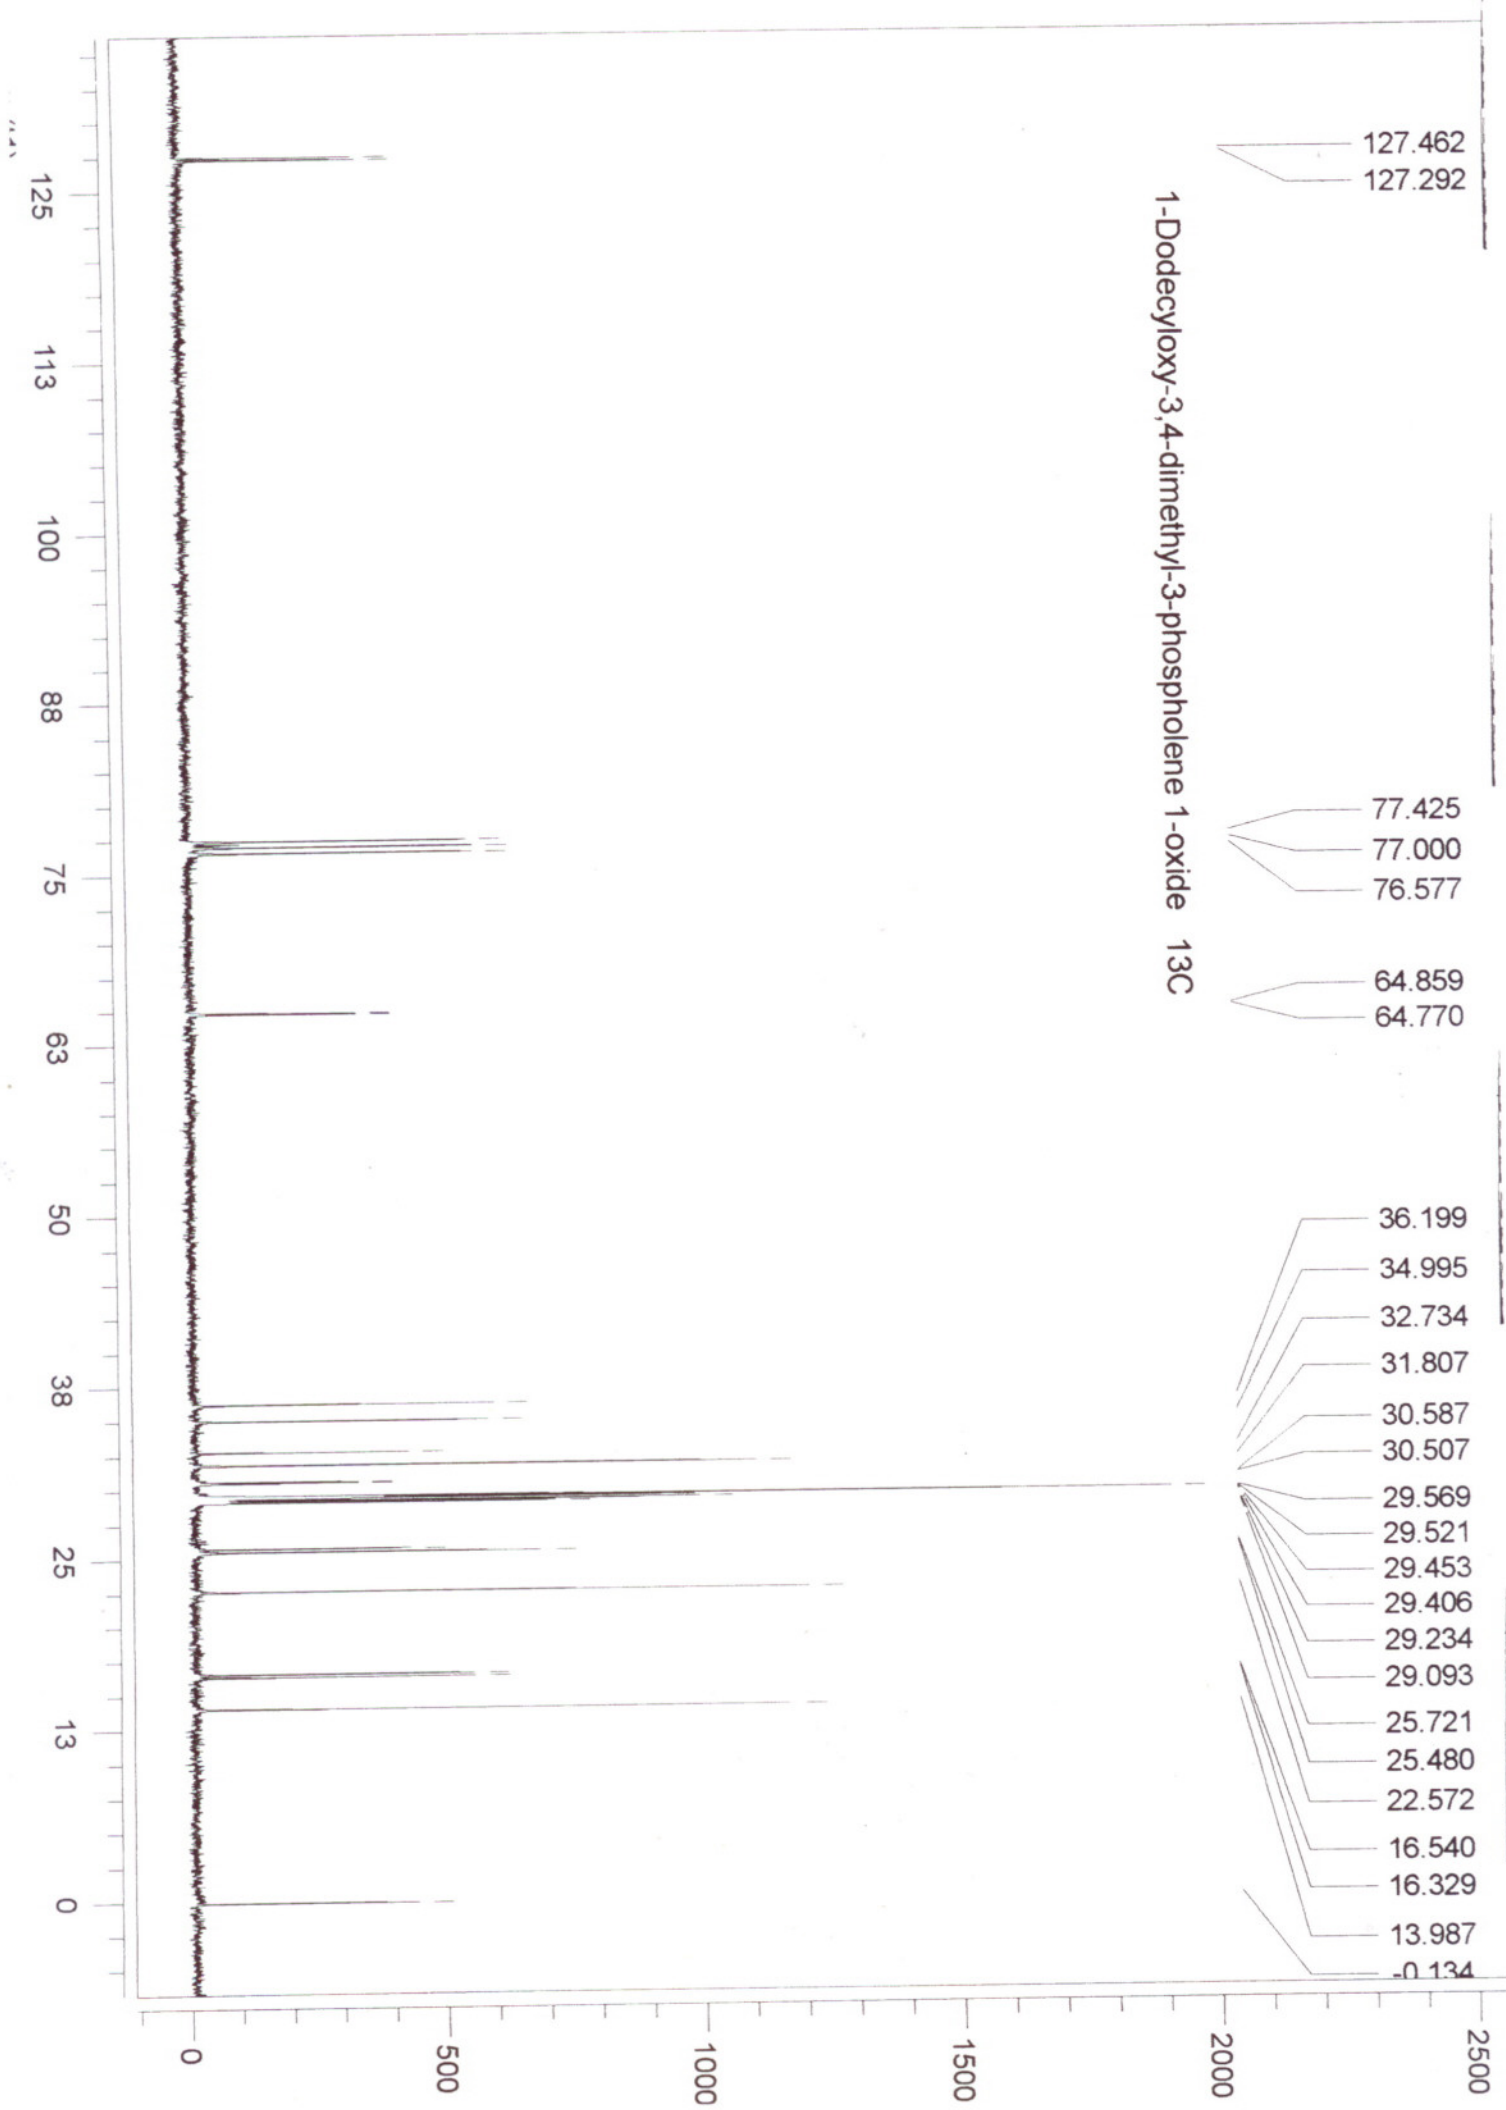

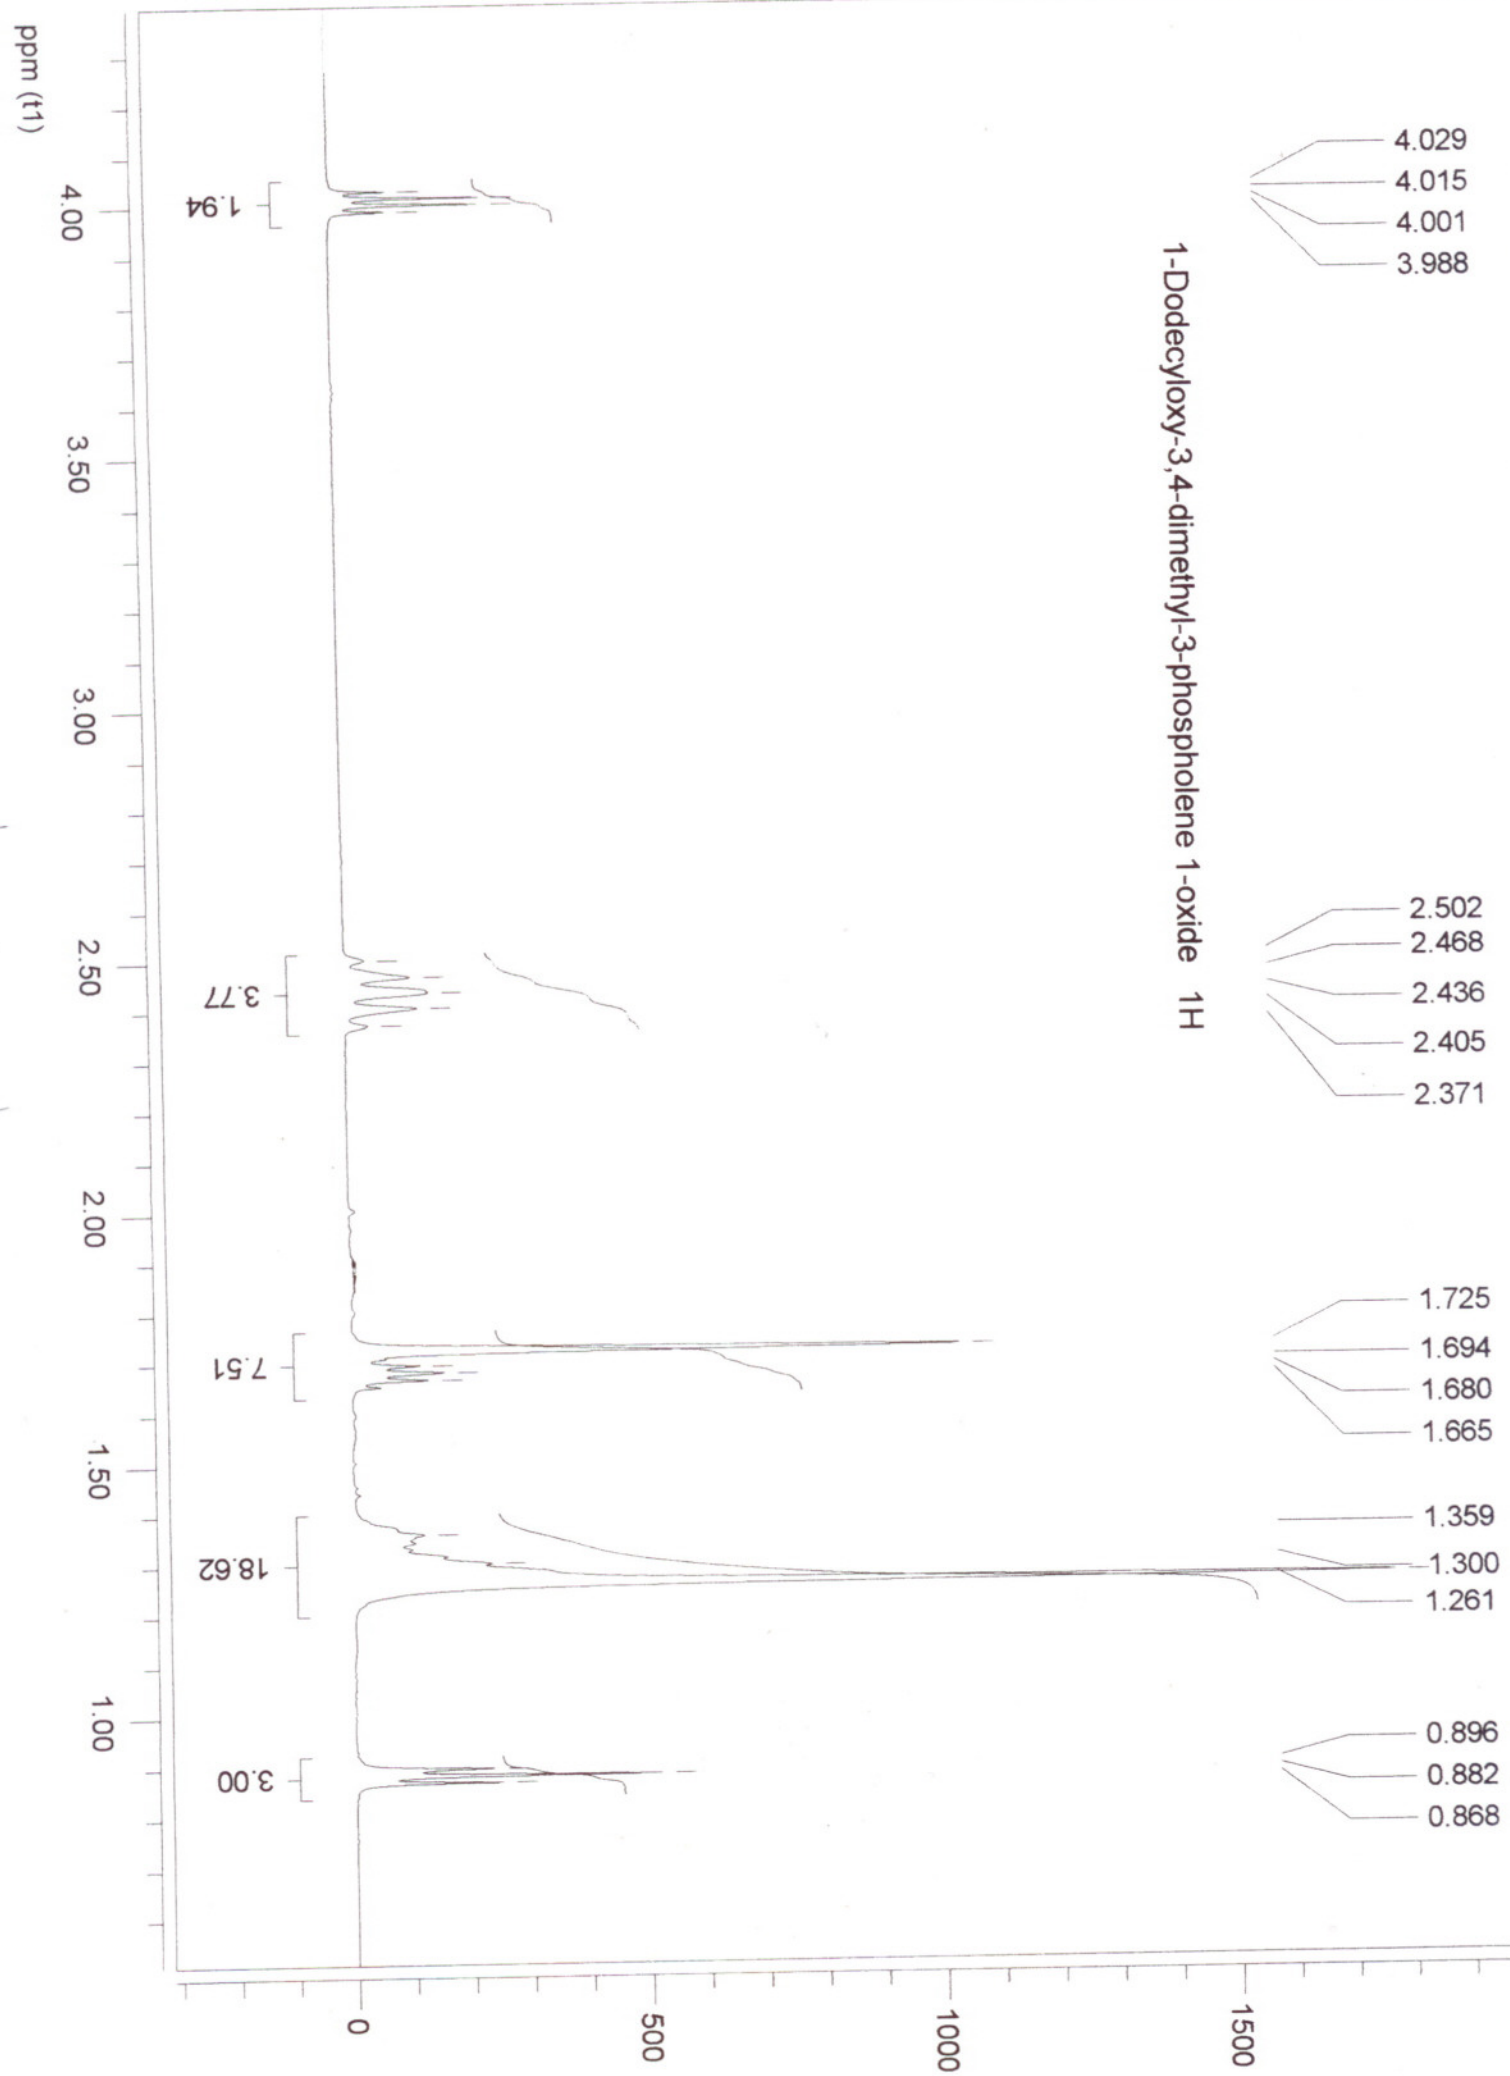

1-Octyloxy-3-methyl-3-phospholene 1-oxide 31P

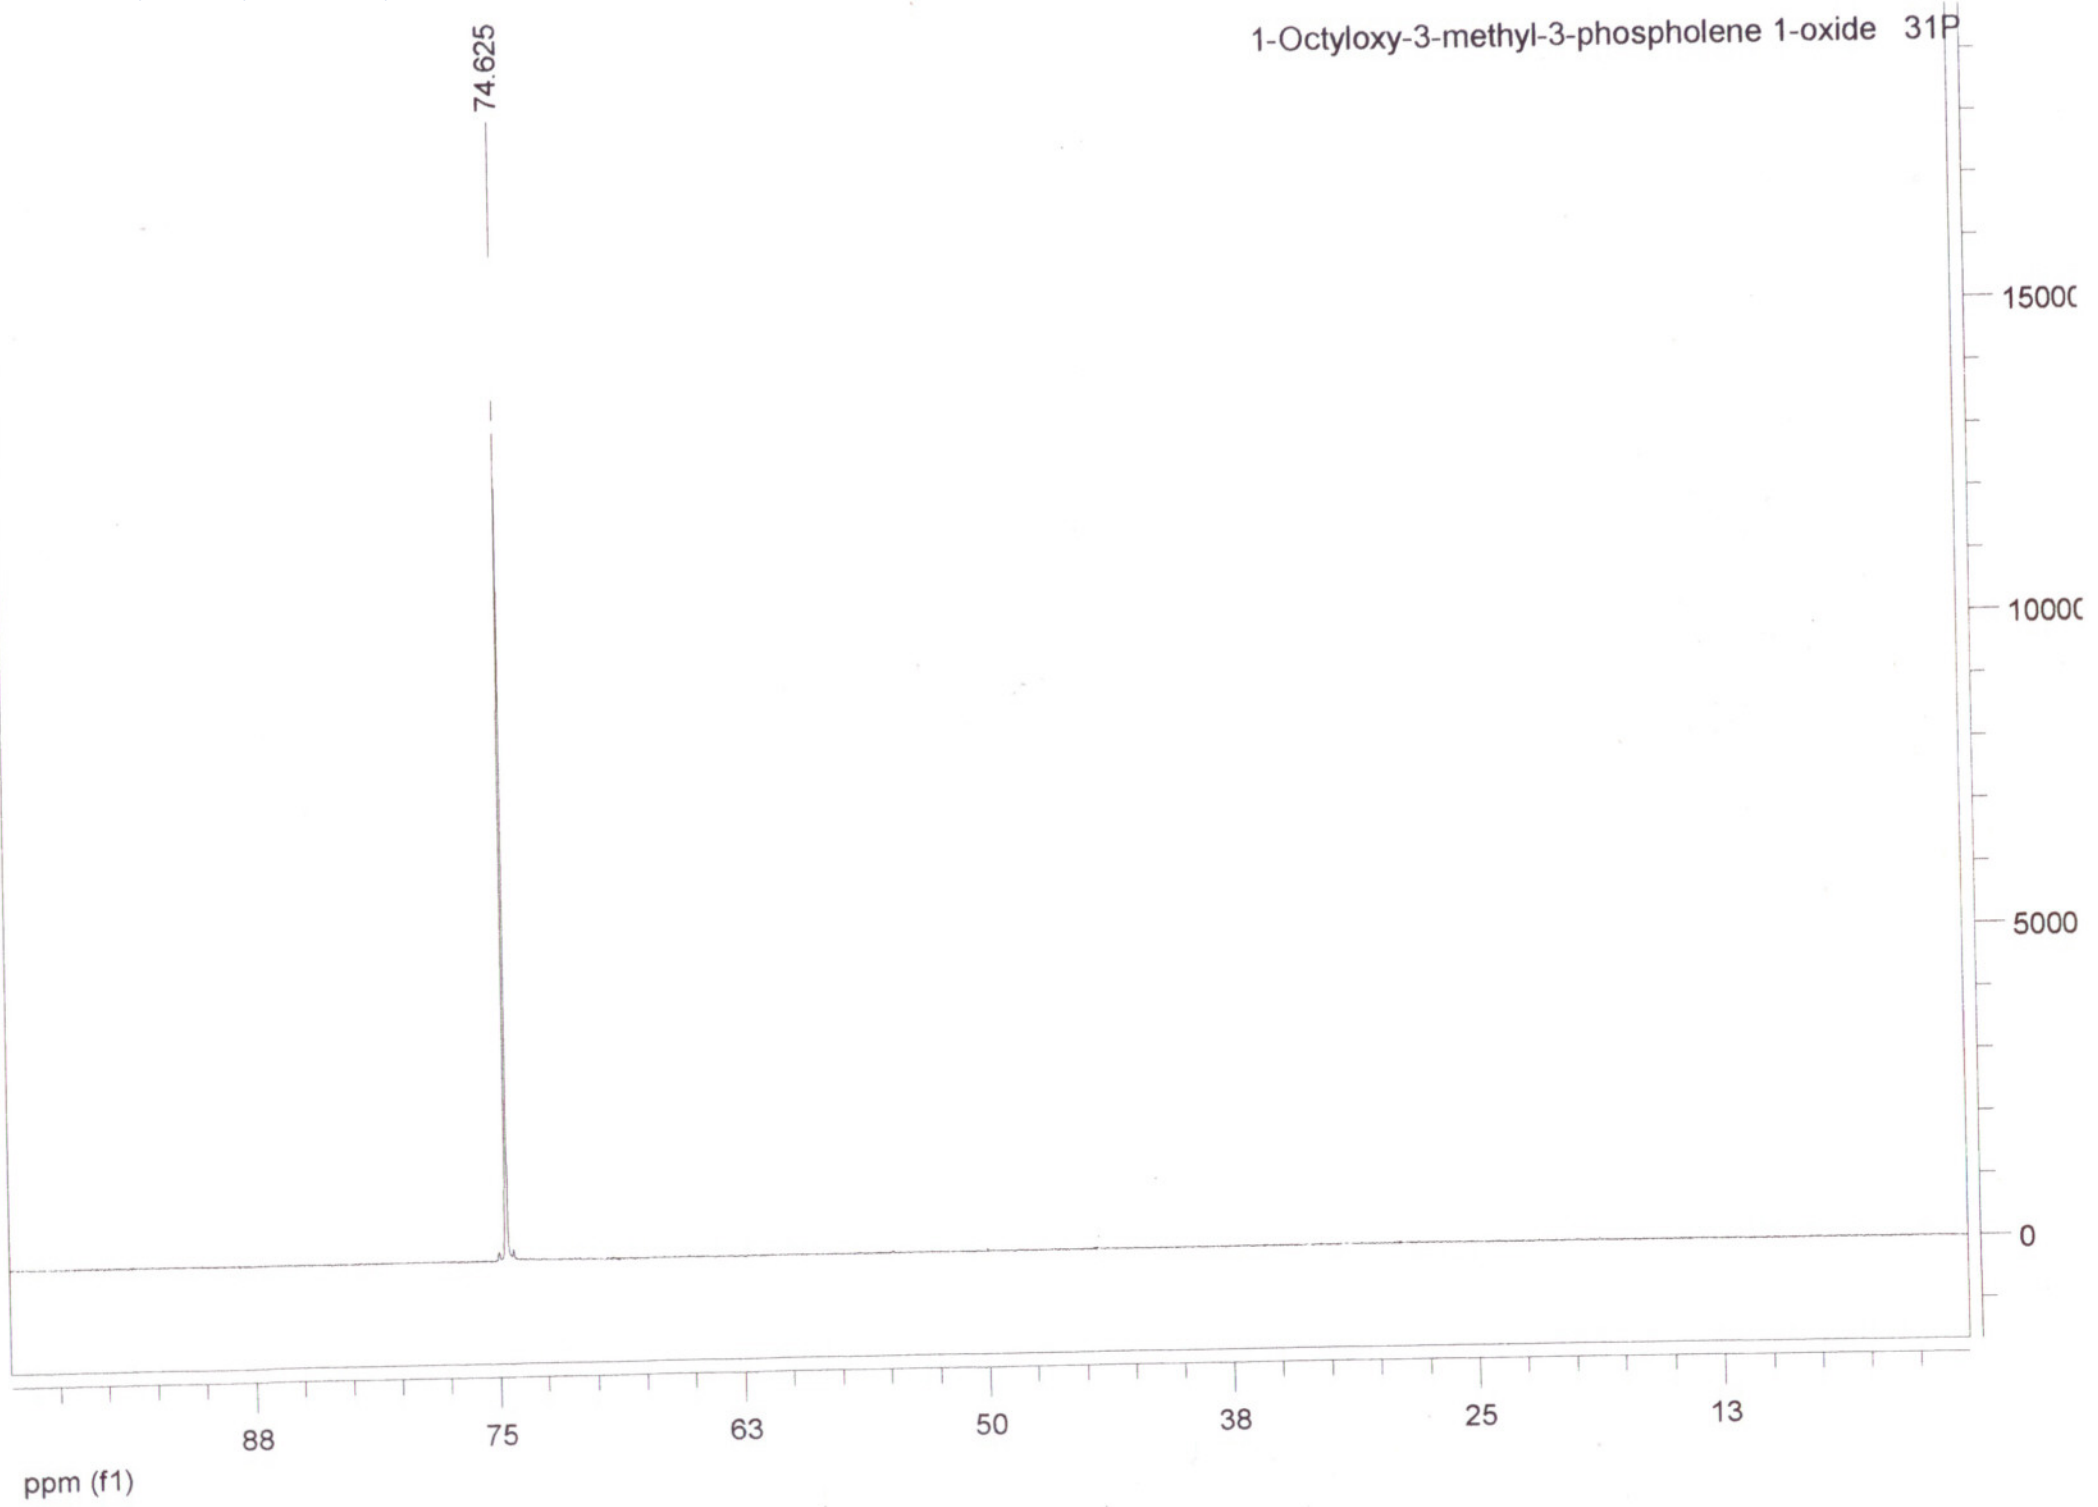

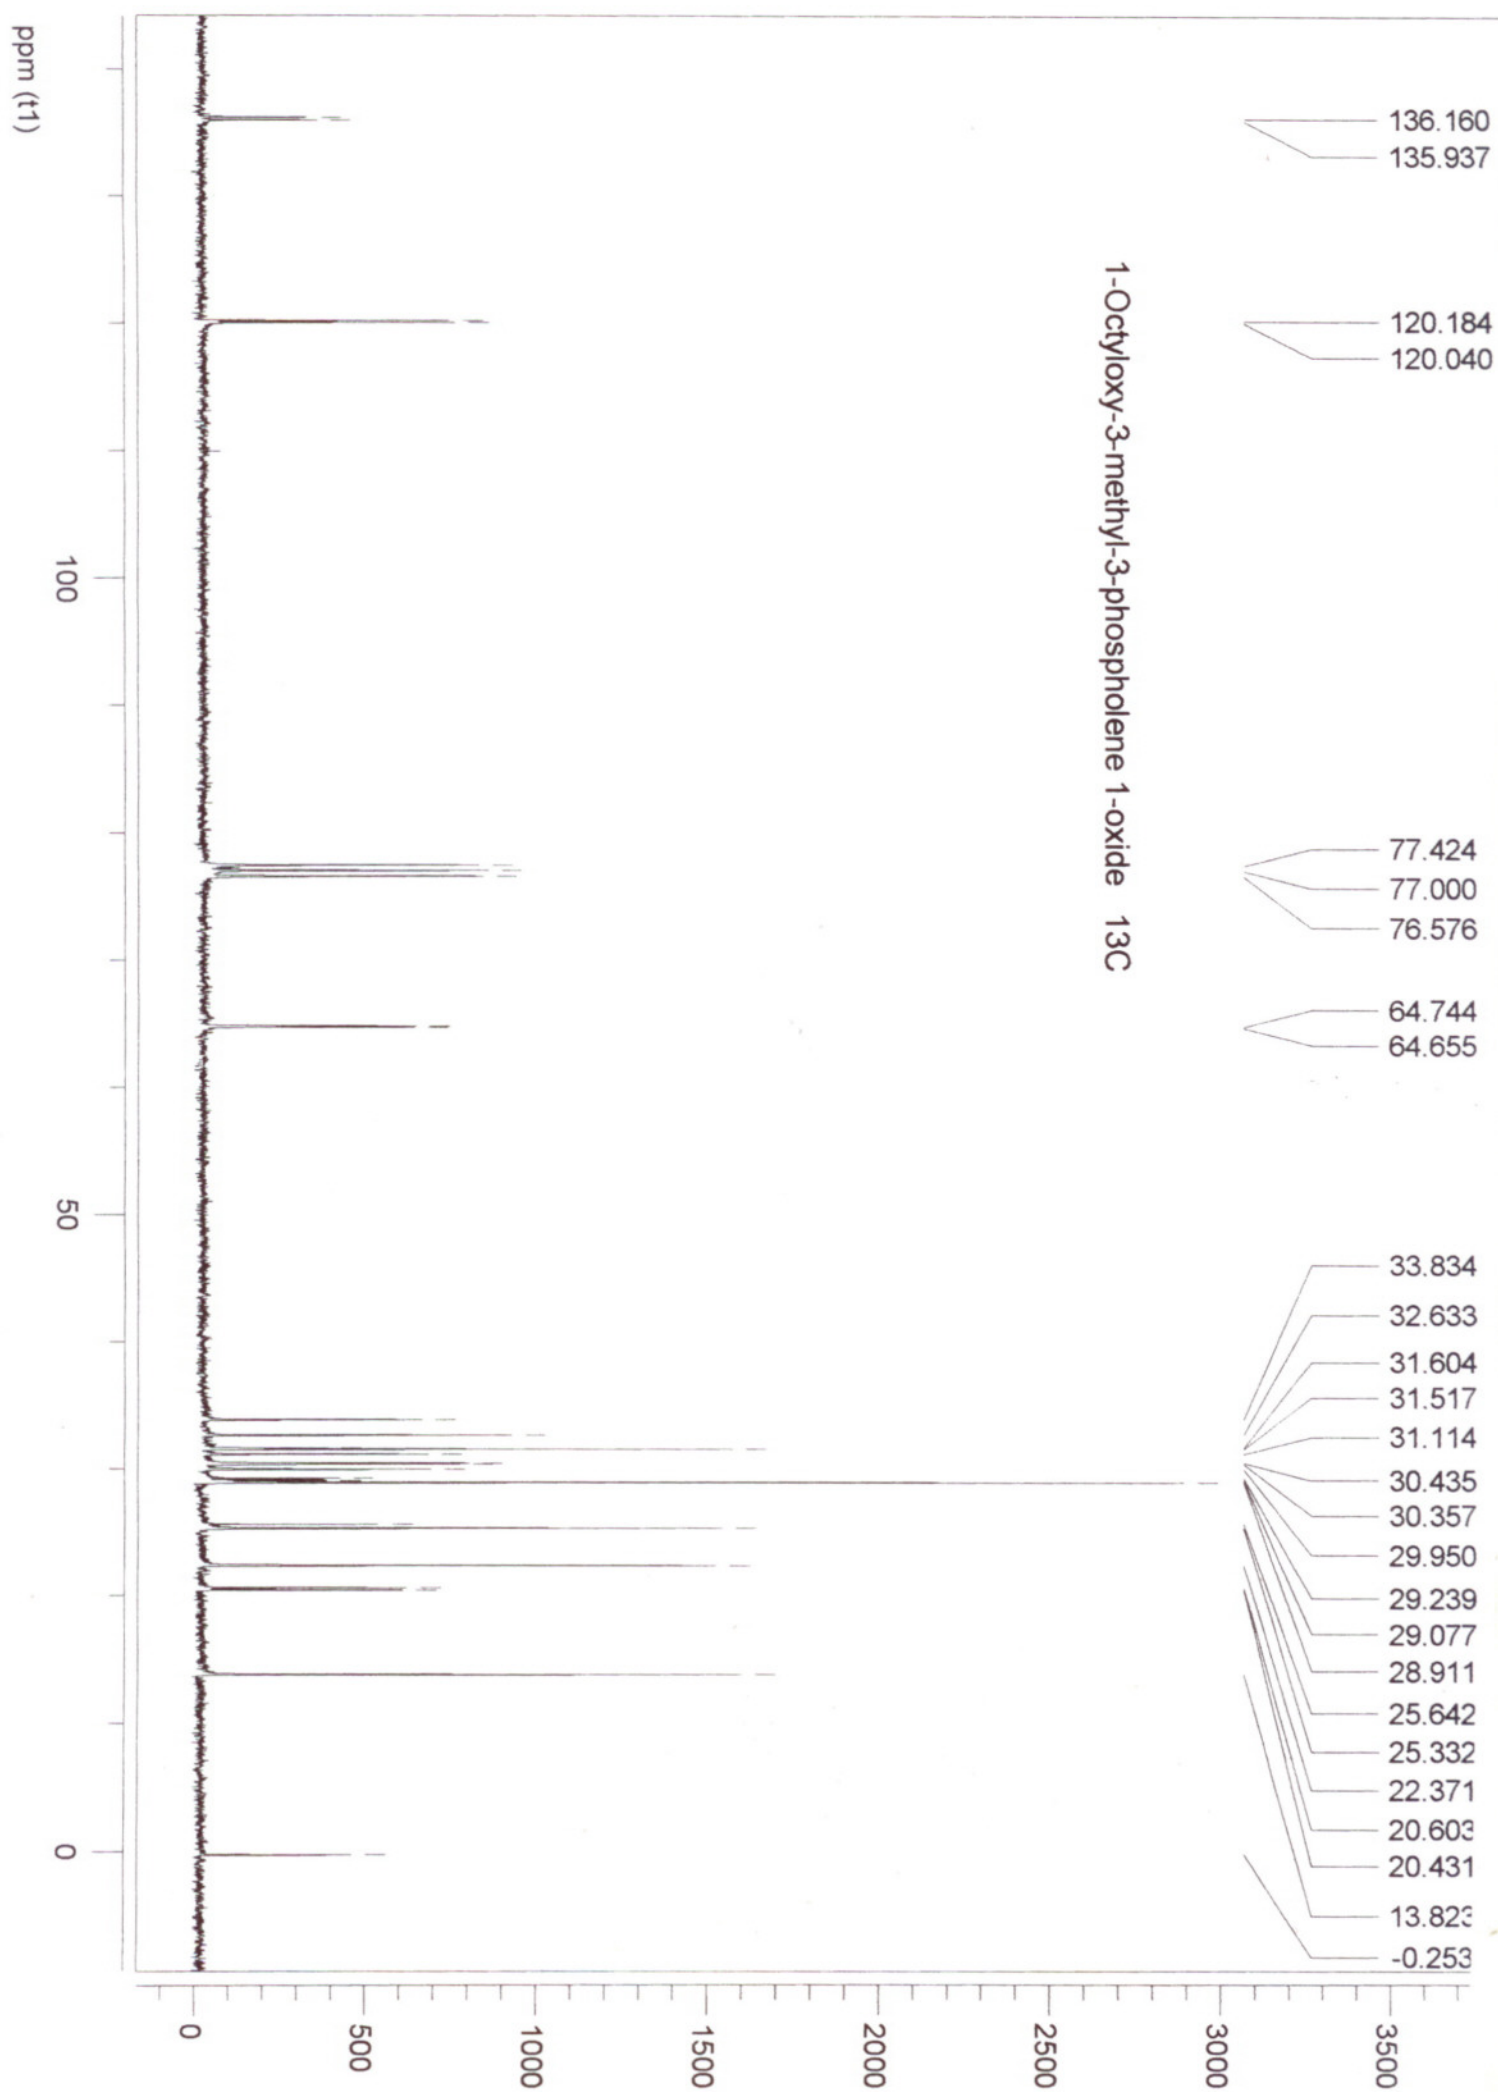

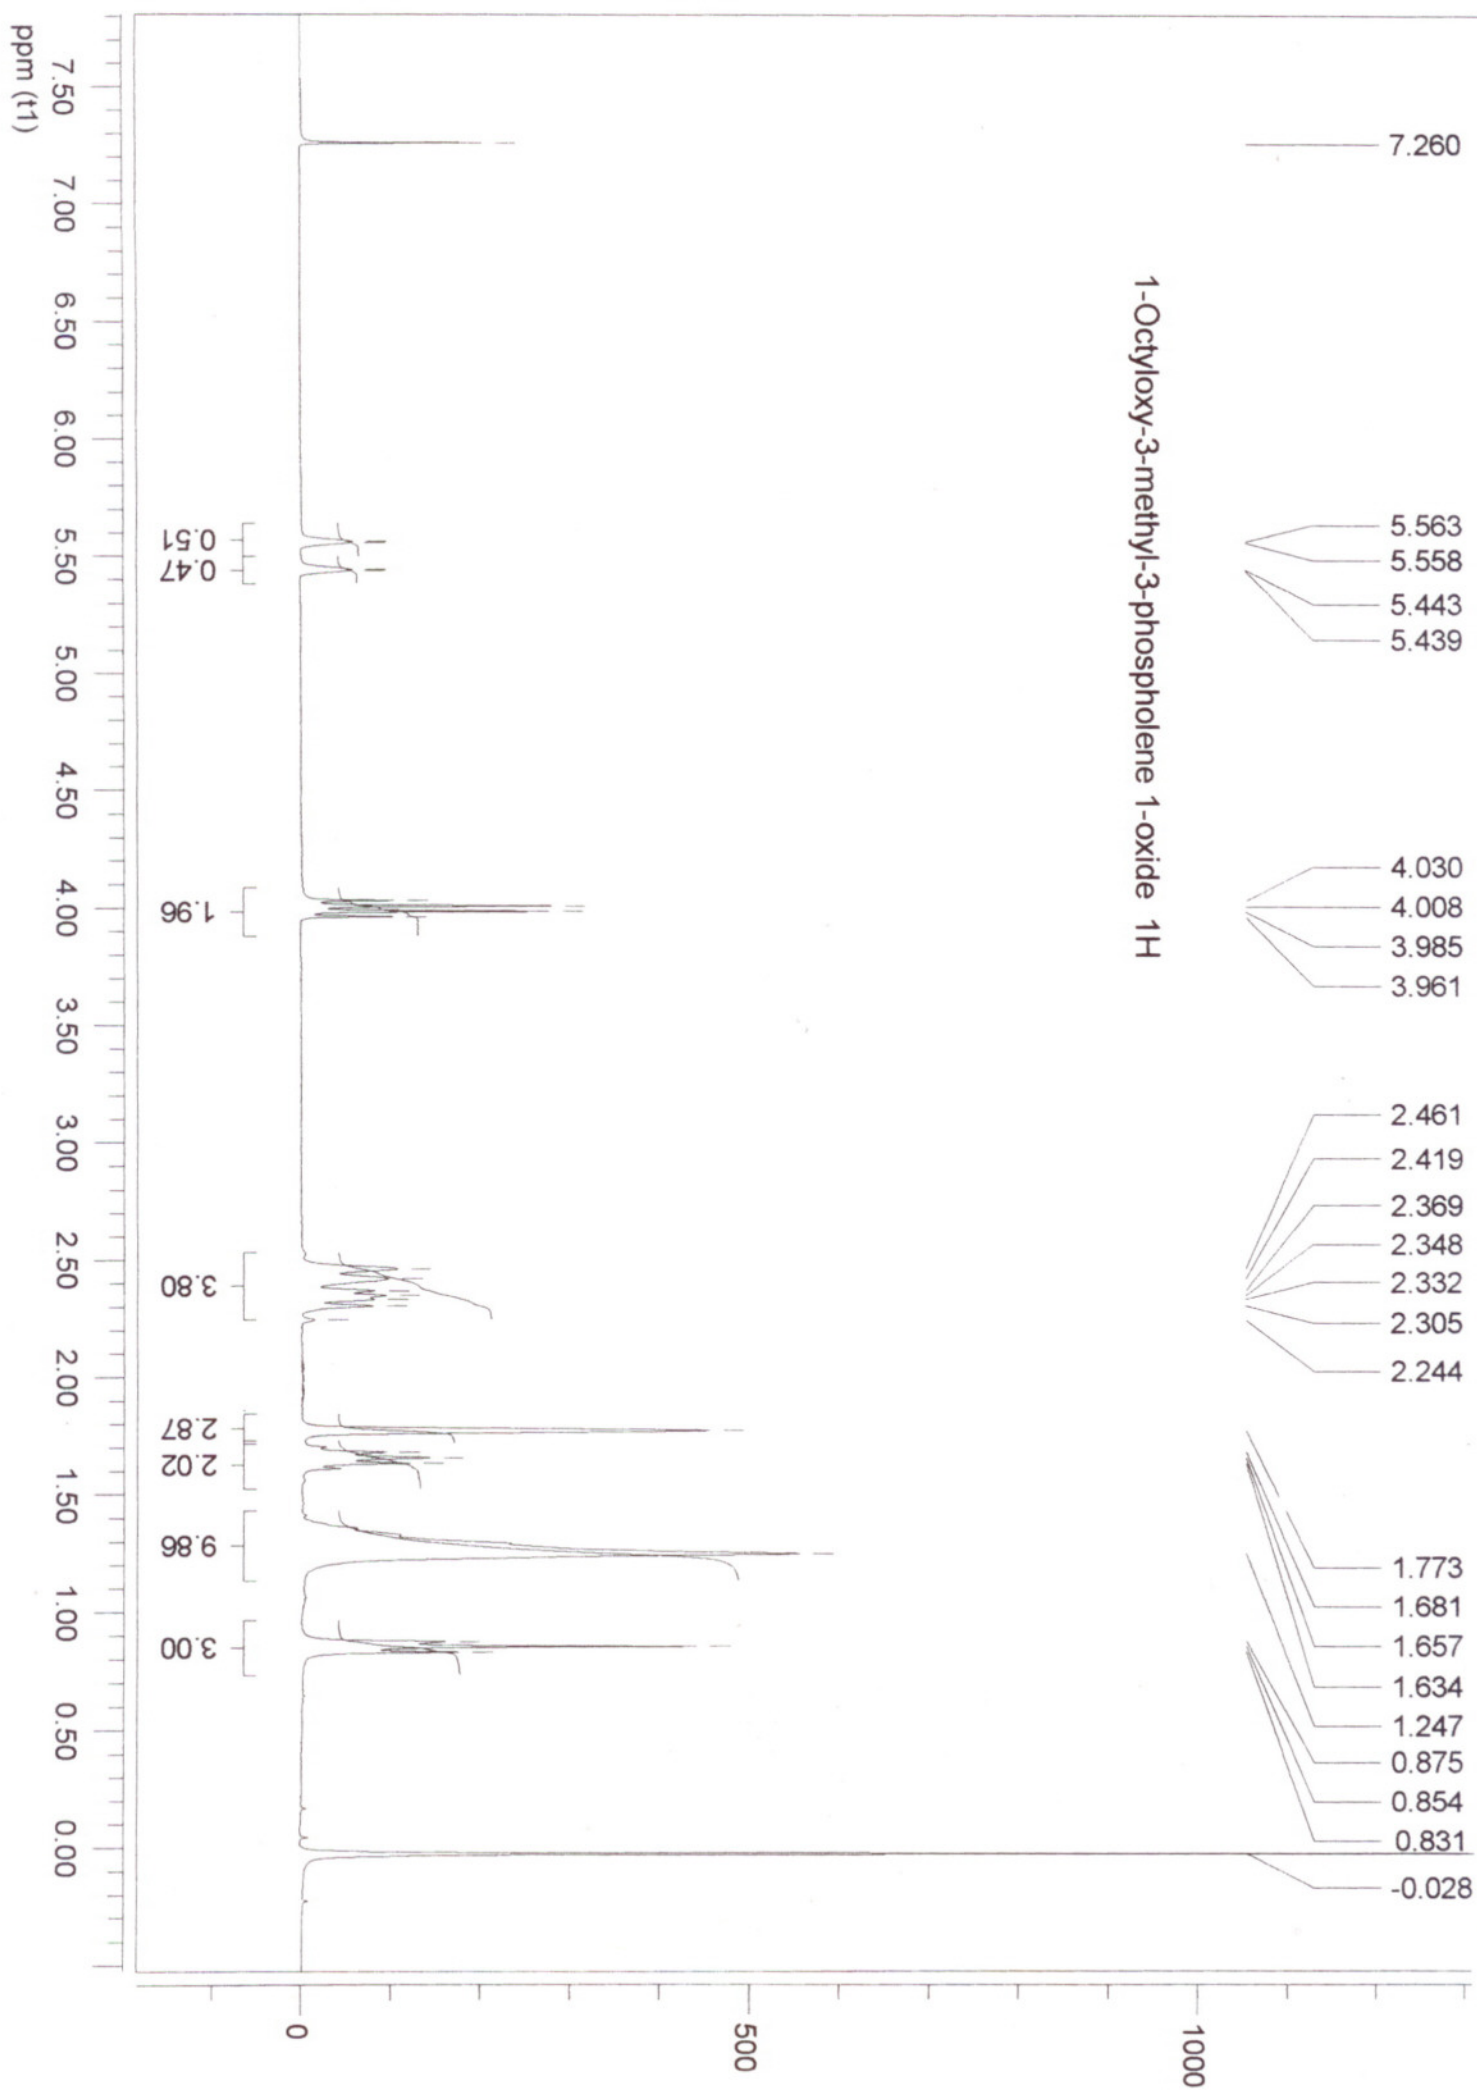

1-Octyloxy-3,4-dimethyl-3-phospholene 1-oxide 31P

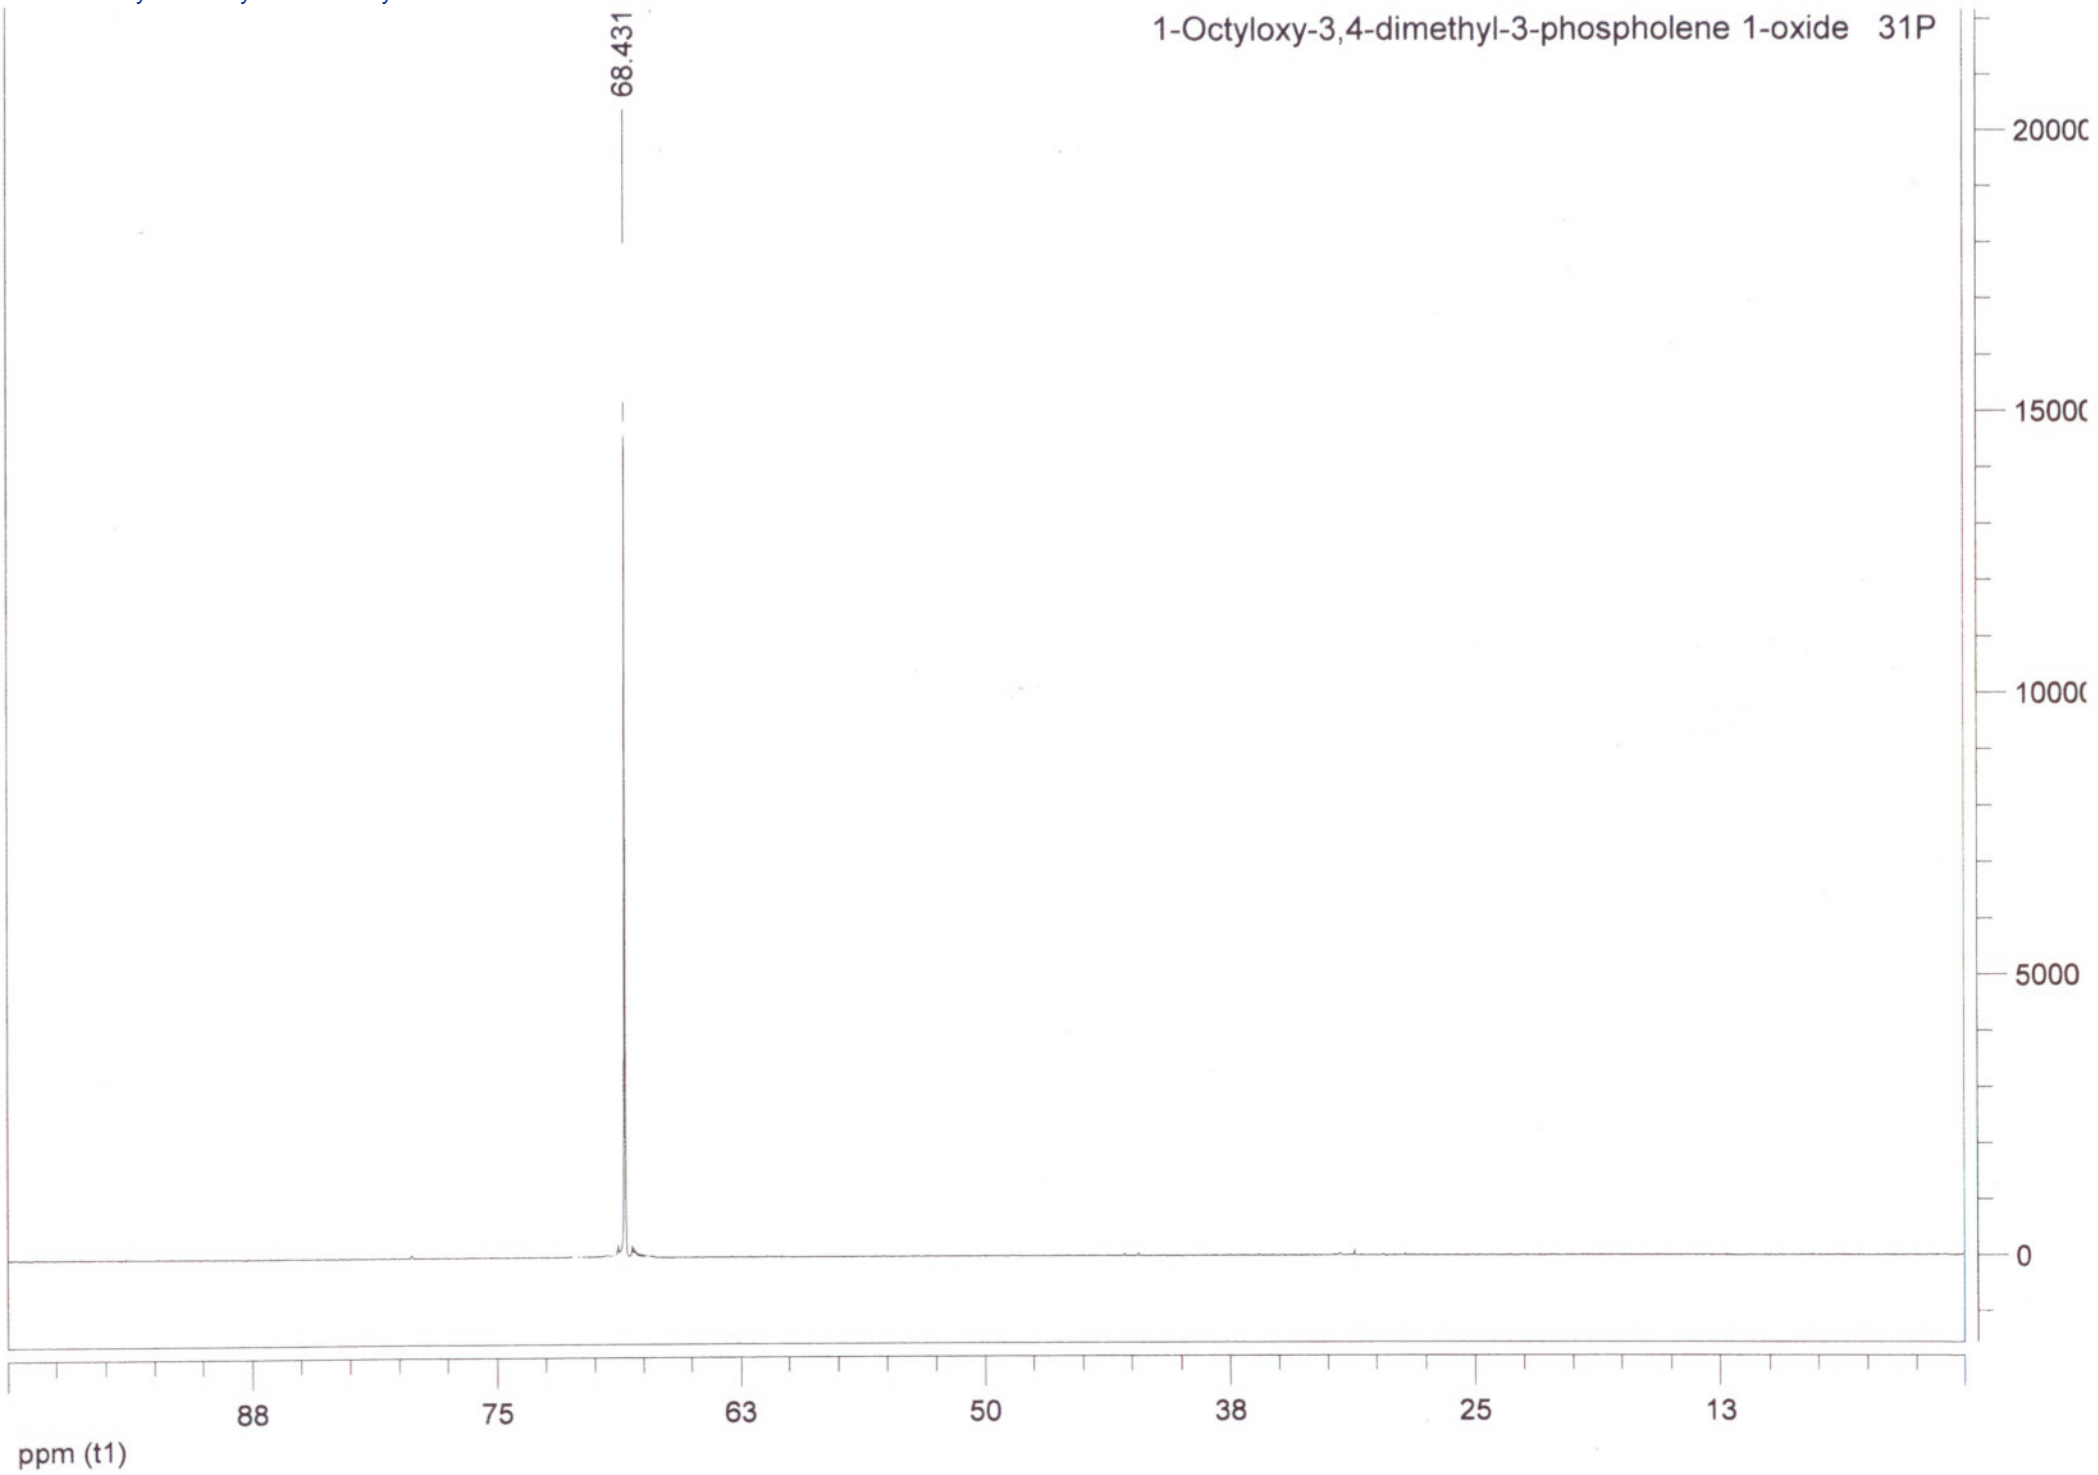

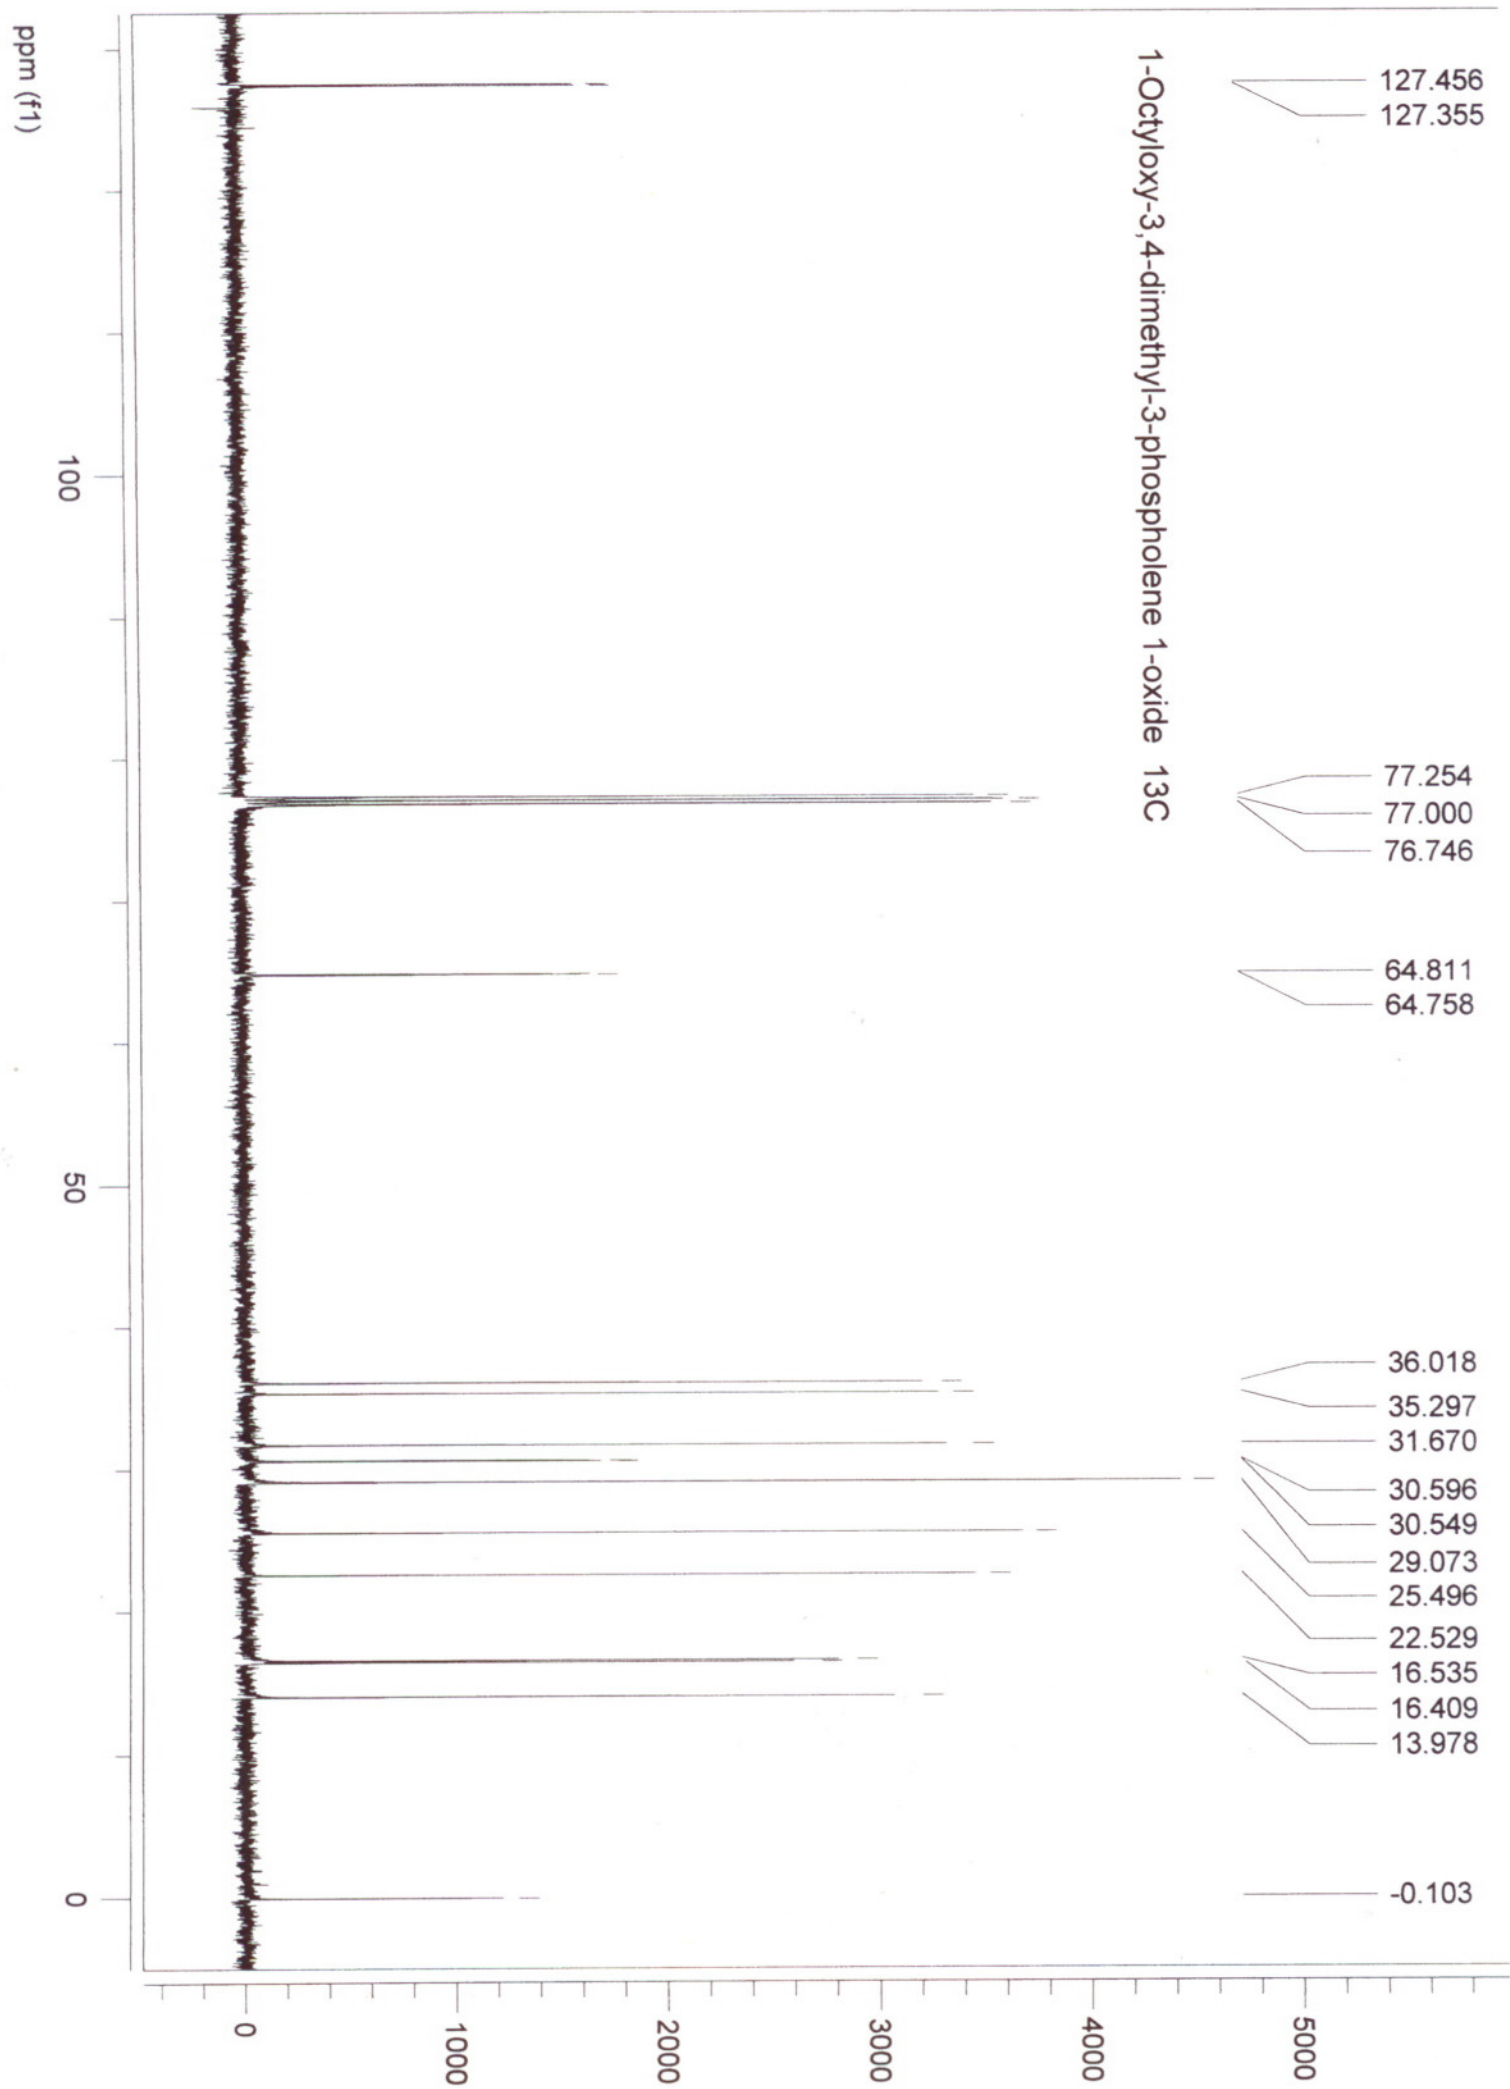



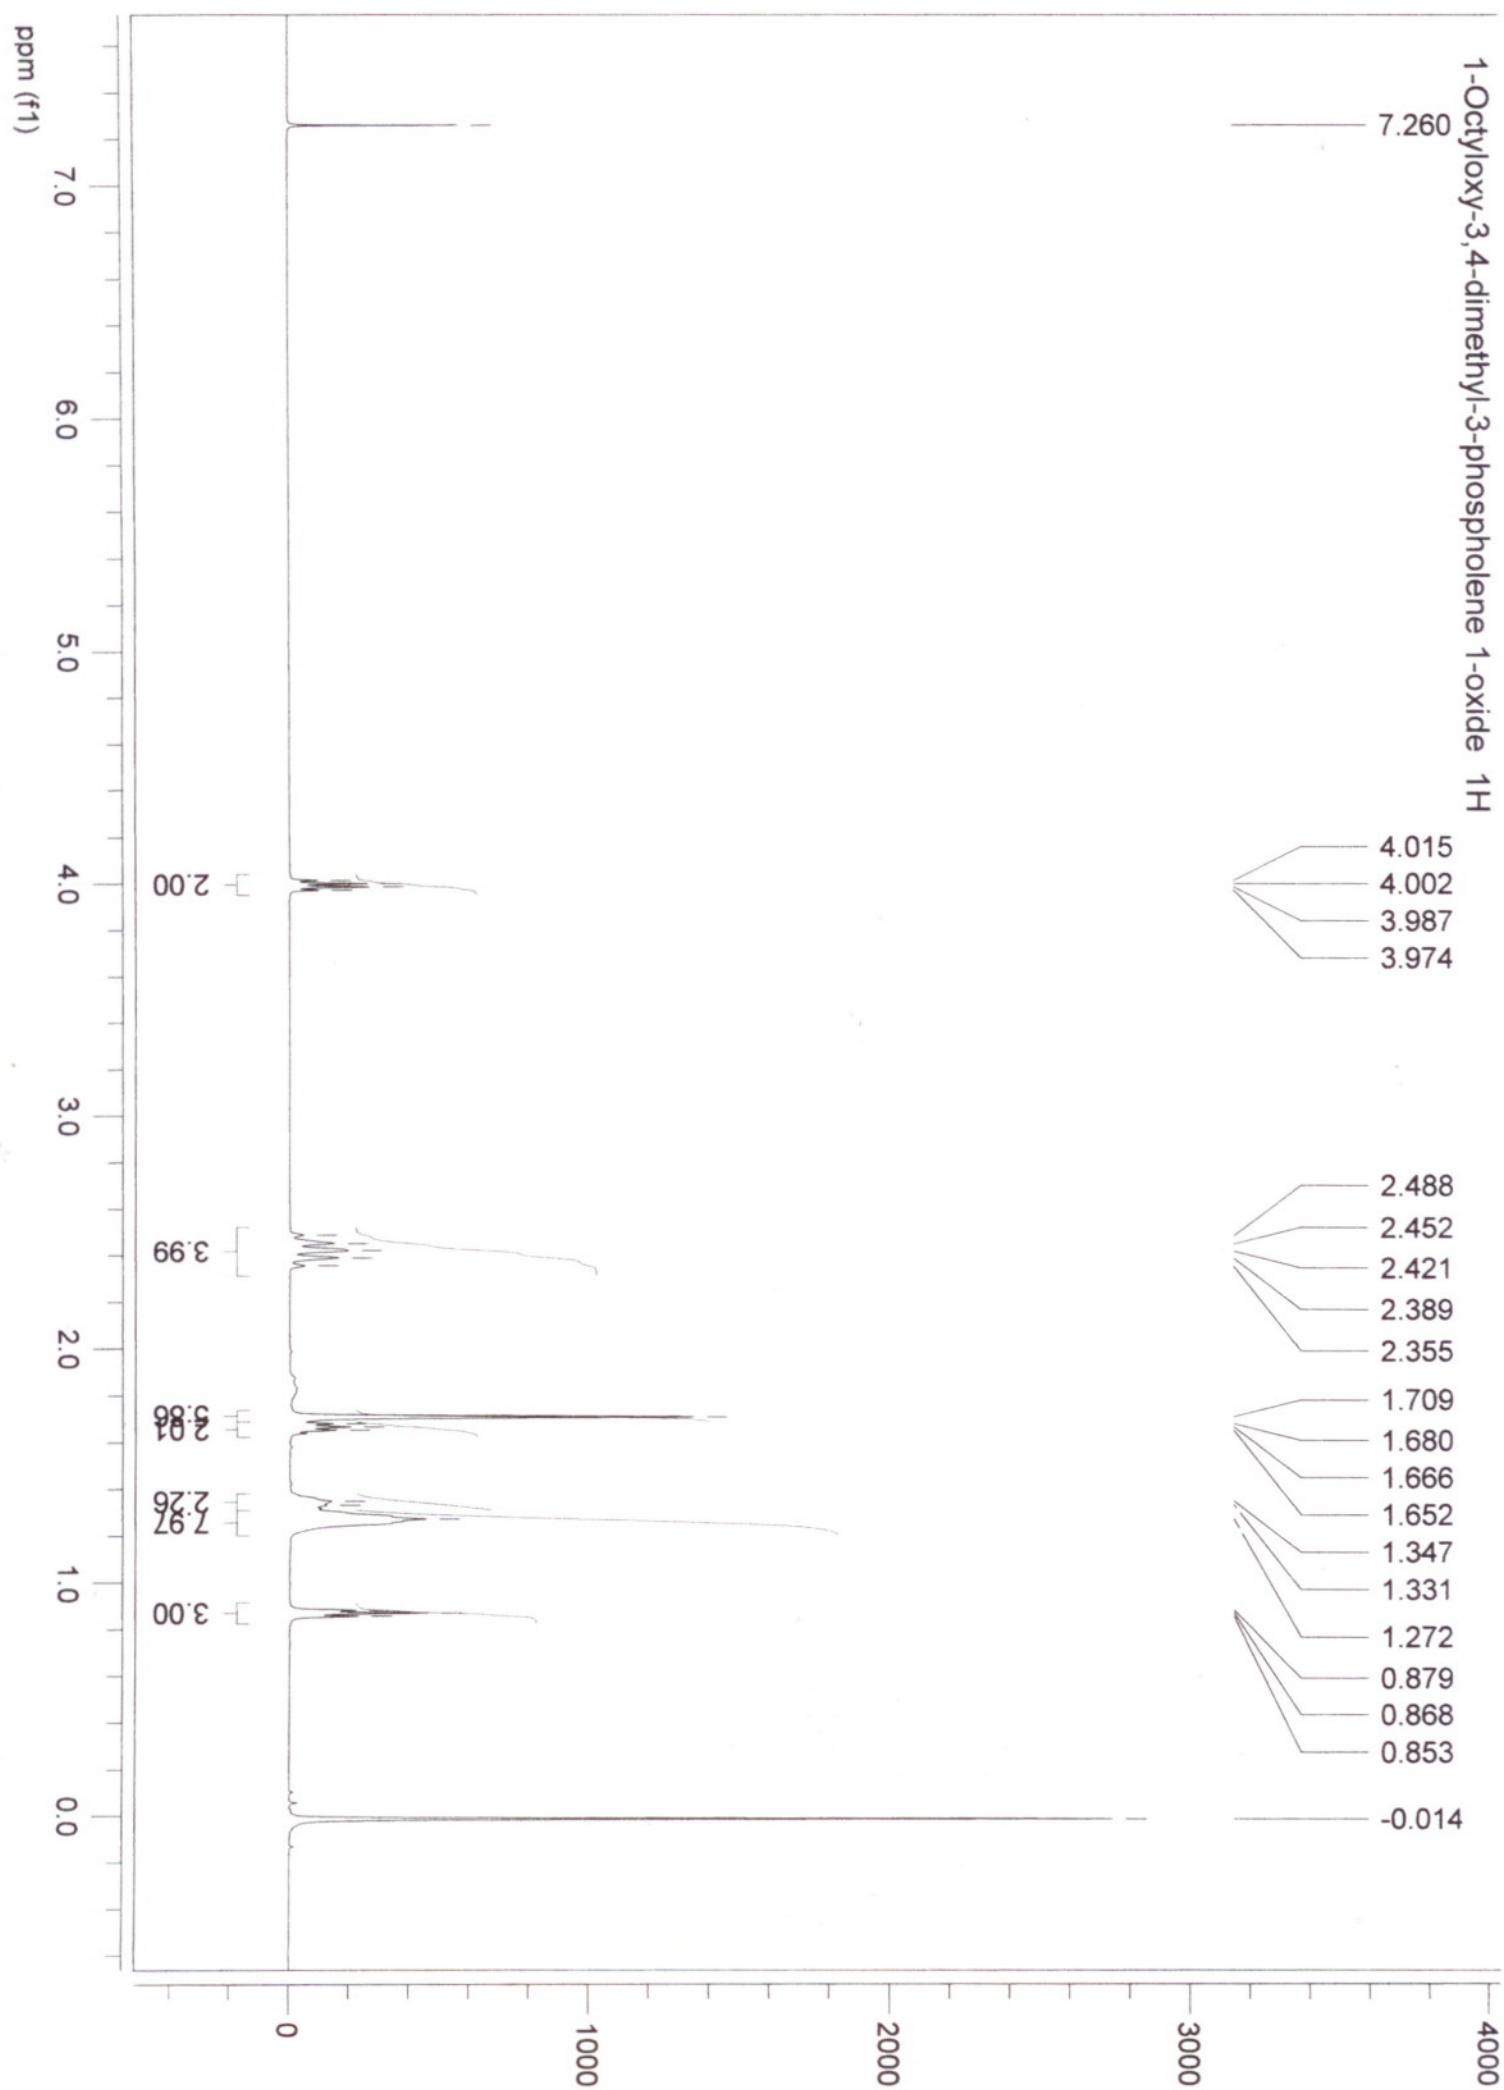

1-Dodecyloxy-3-methyl-3-phospholene 1-oxide <sup>31</sup>P

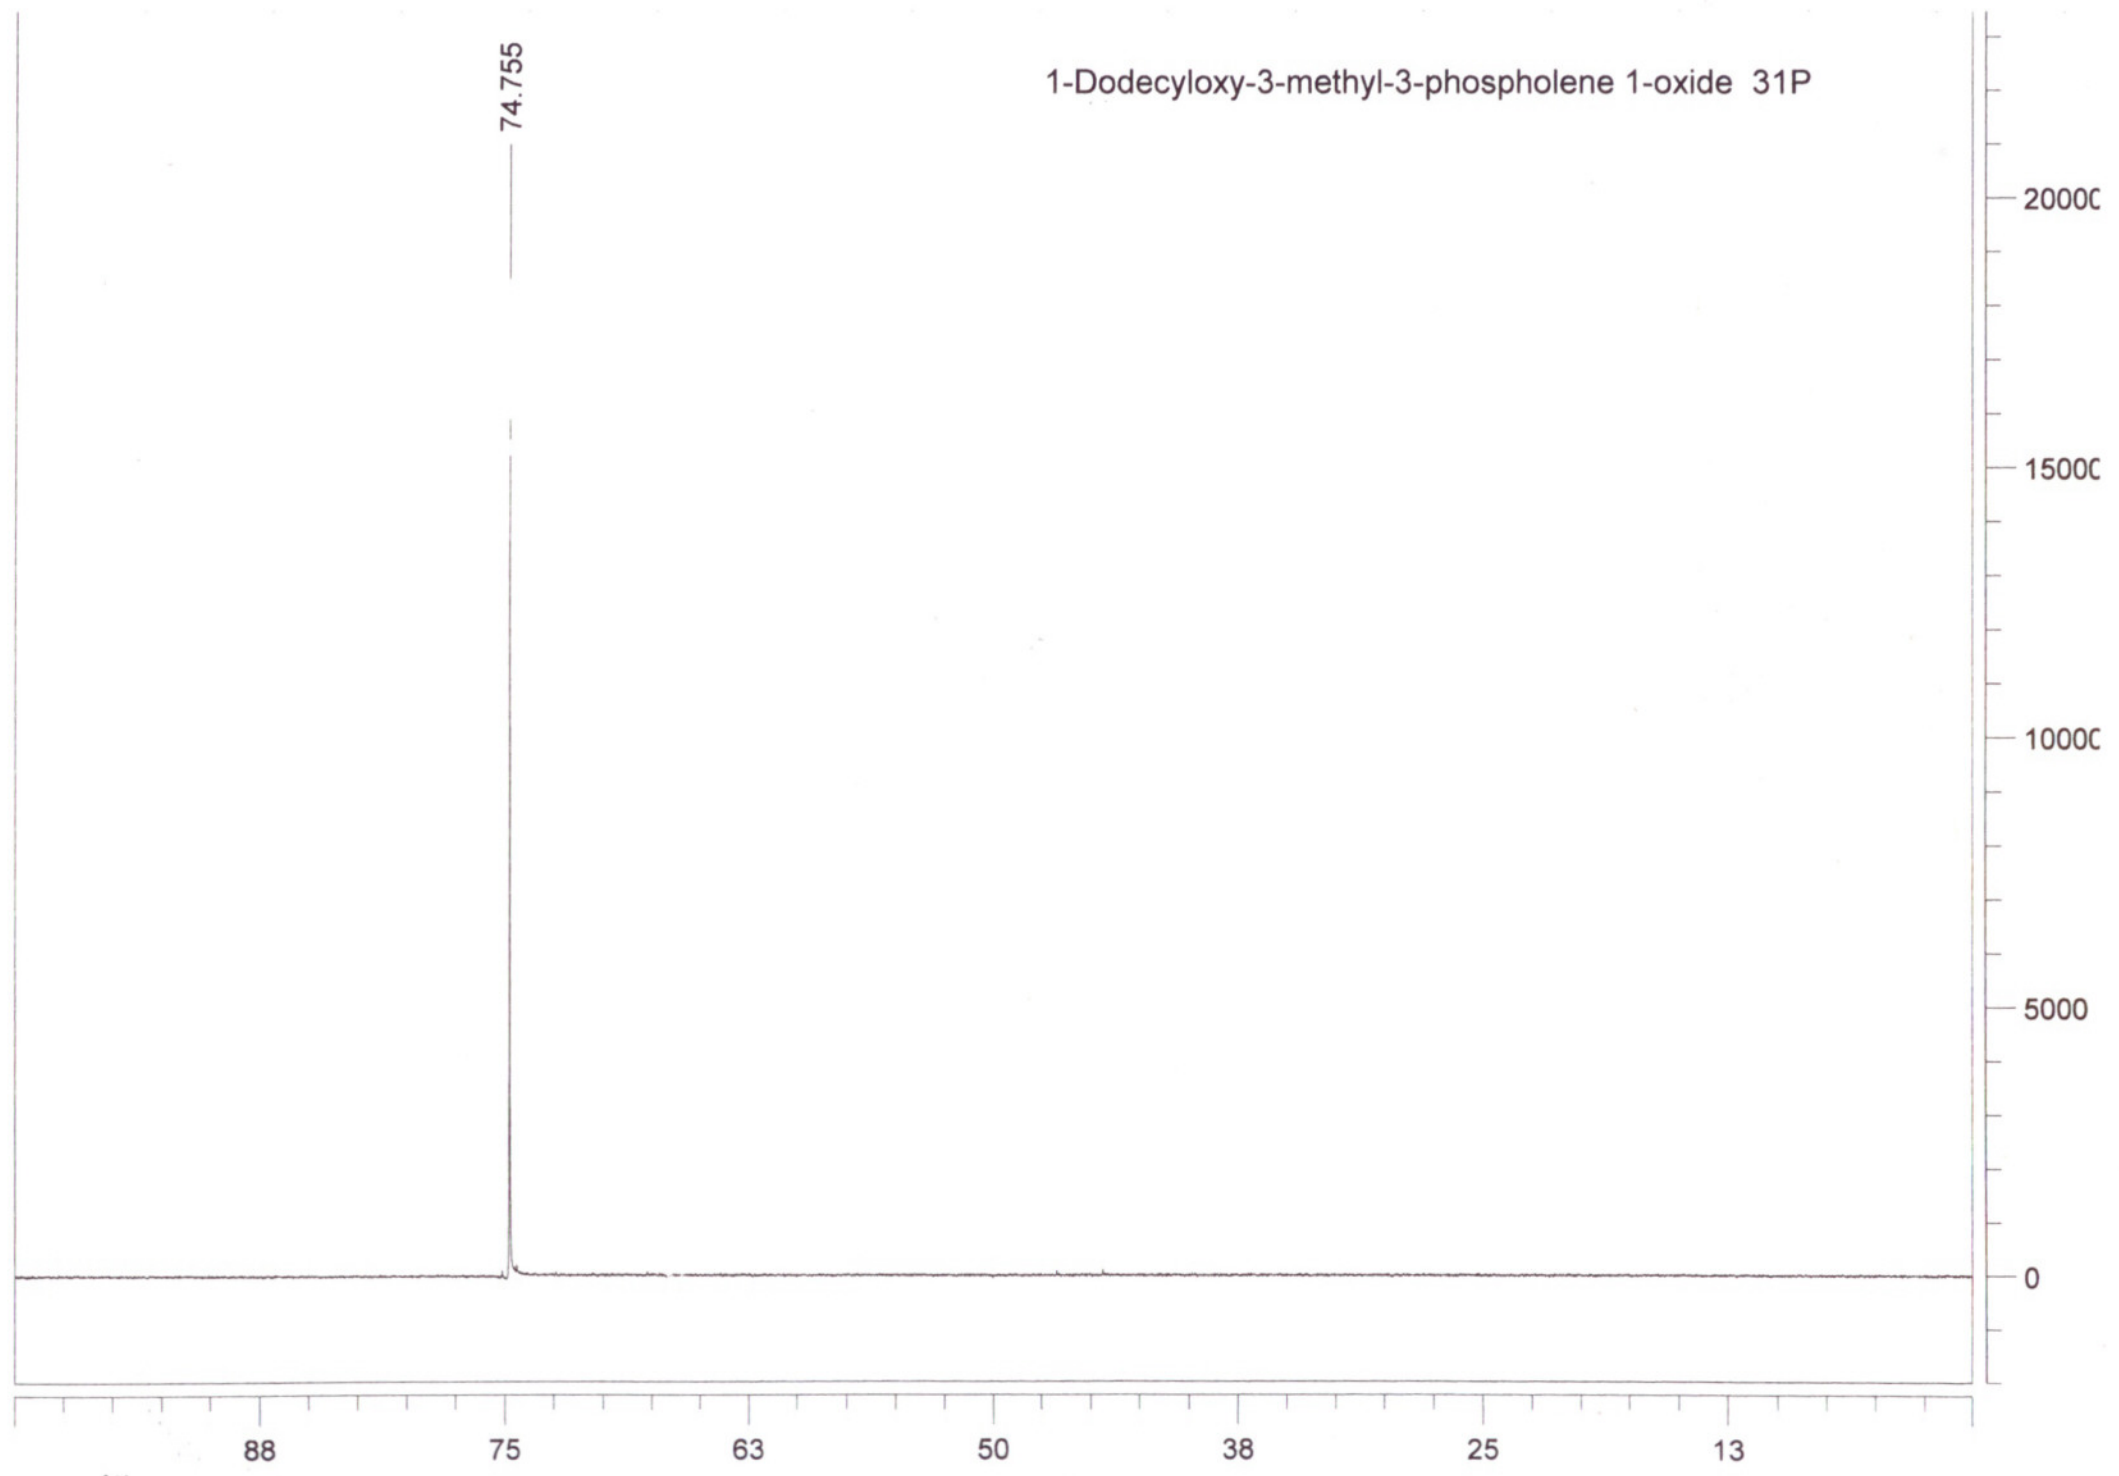

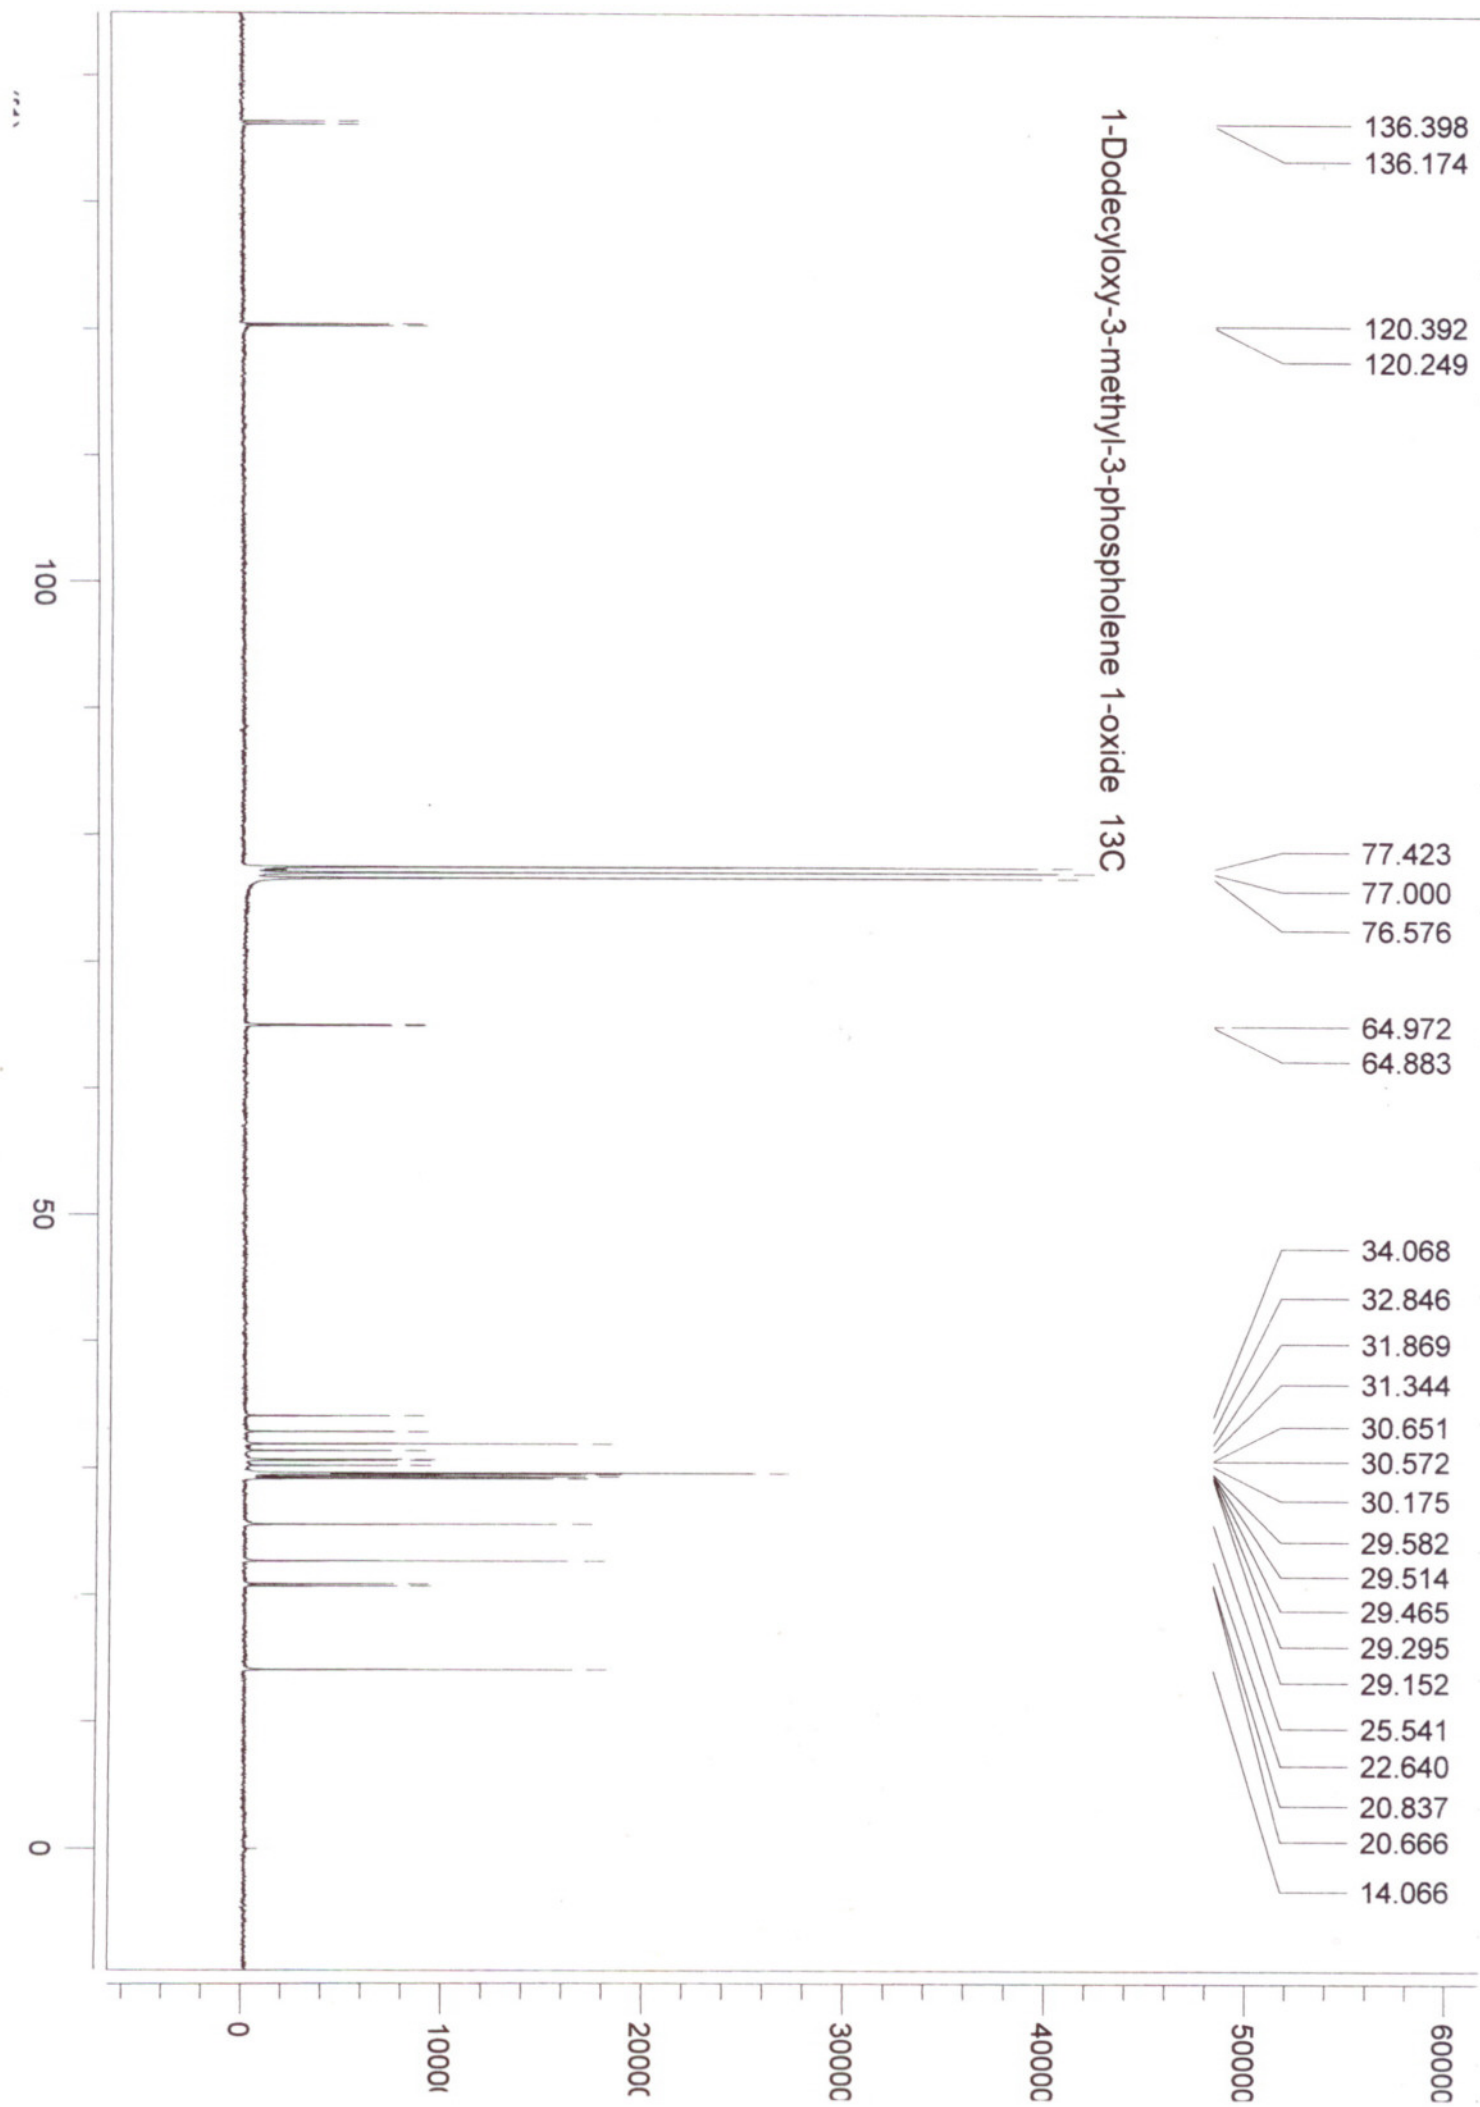

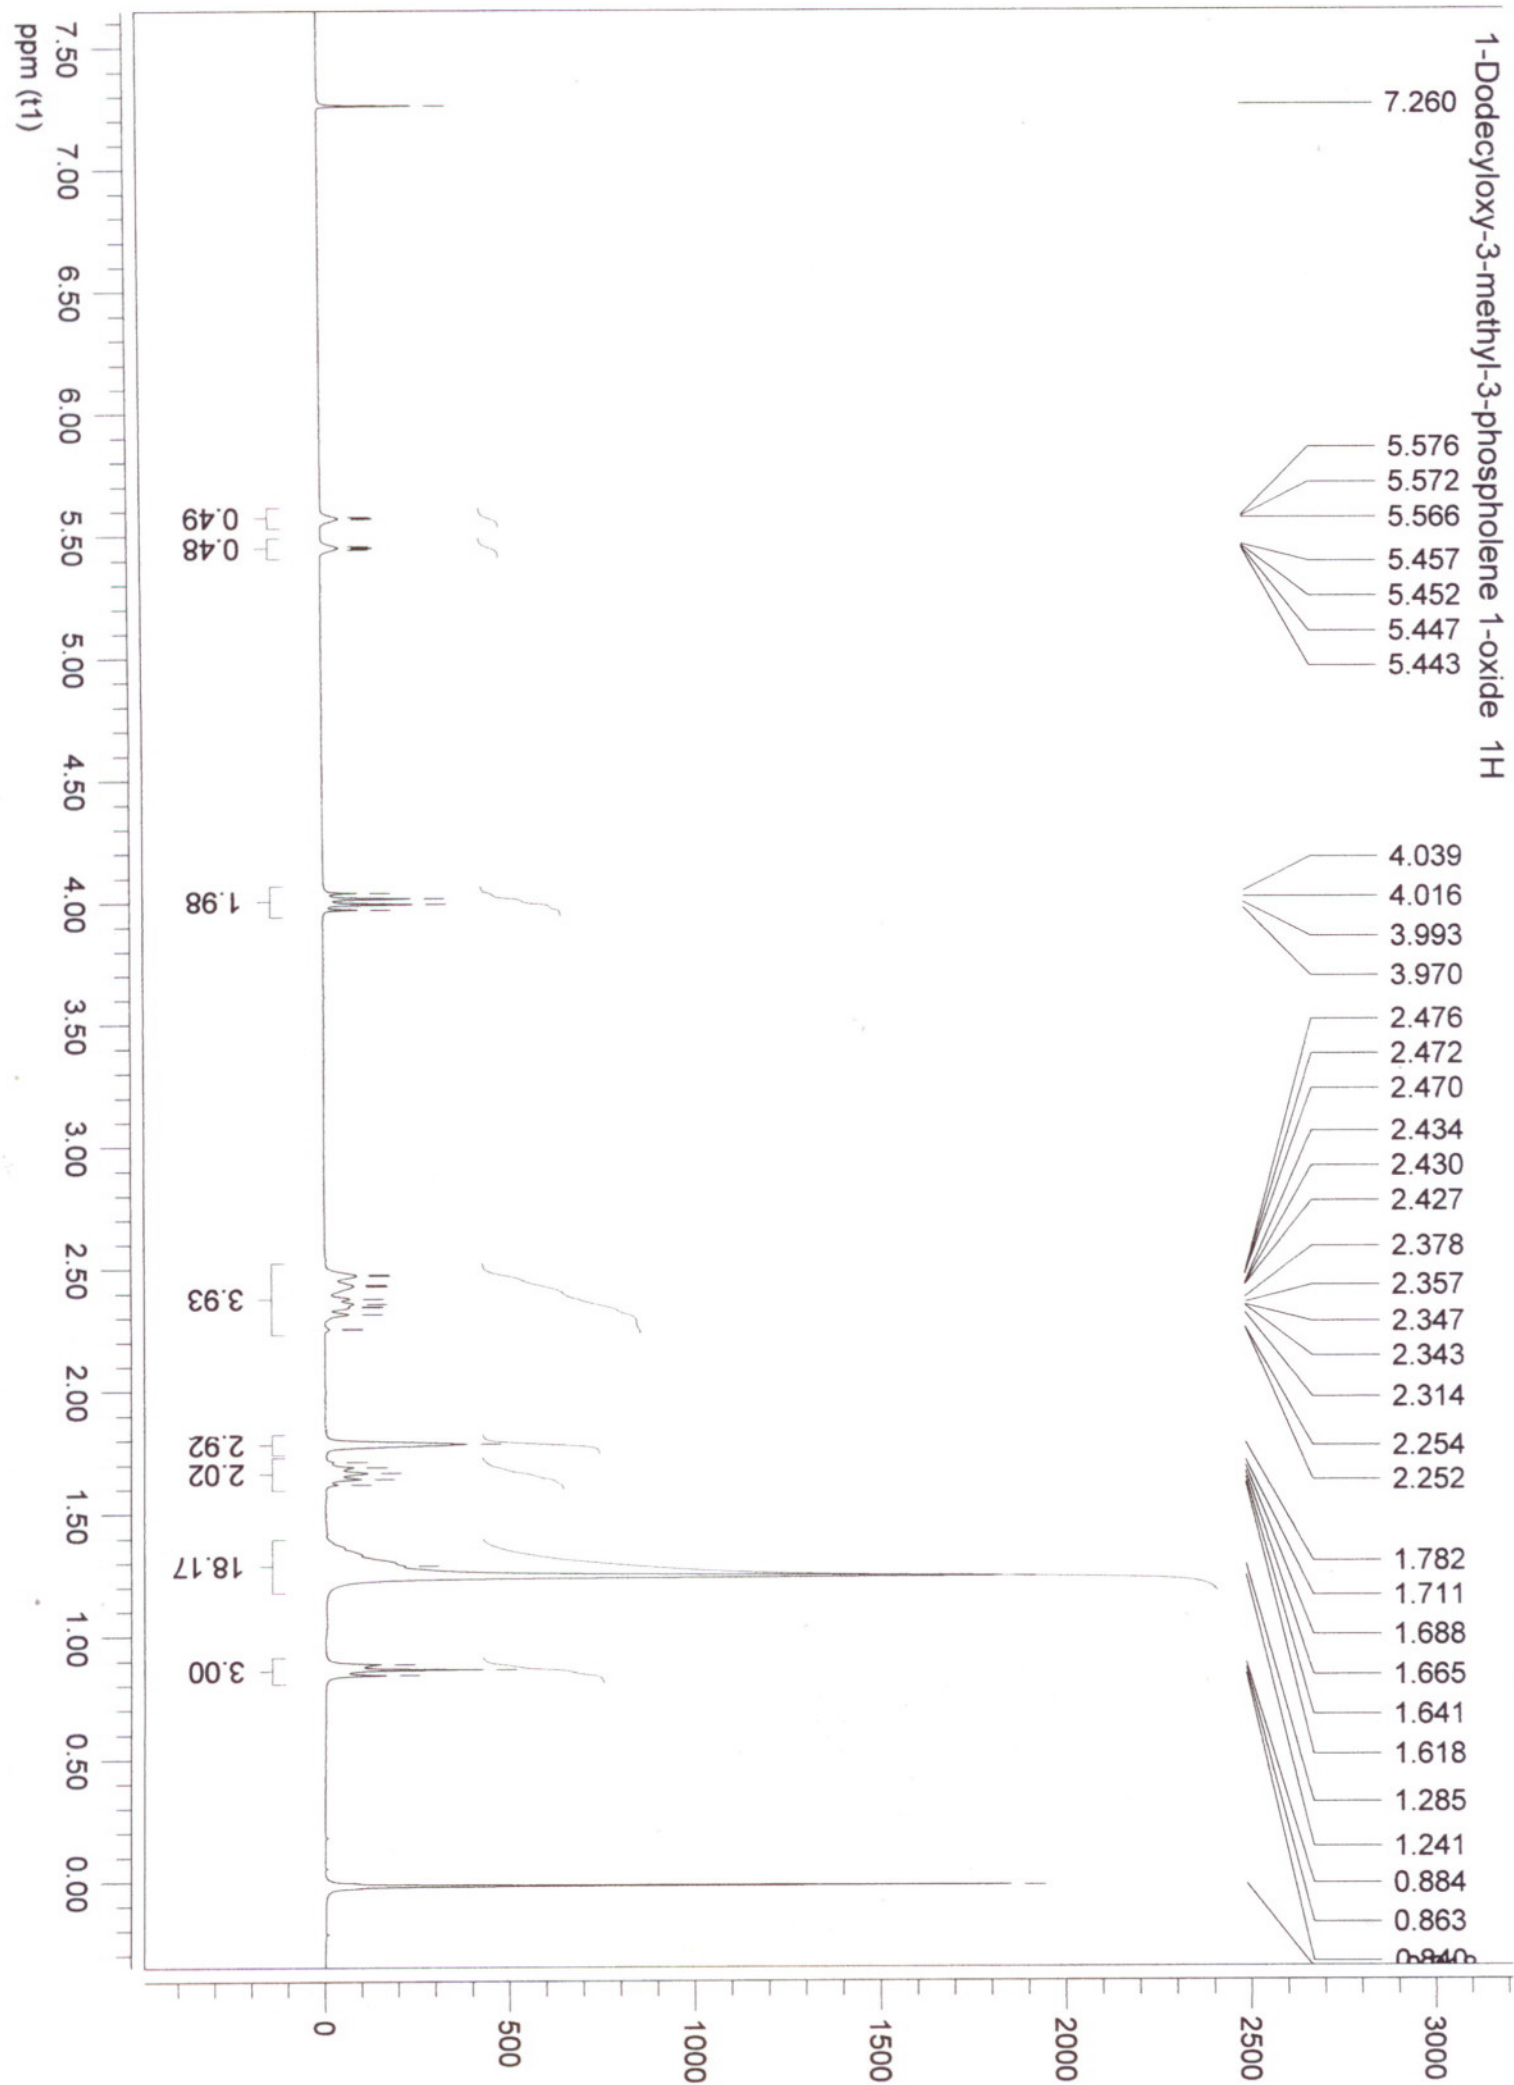

1-Octyloxy-3,4-dimethyl-3-phospholane 1-oxide 31P

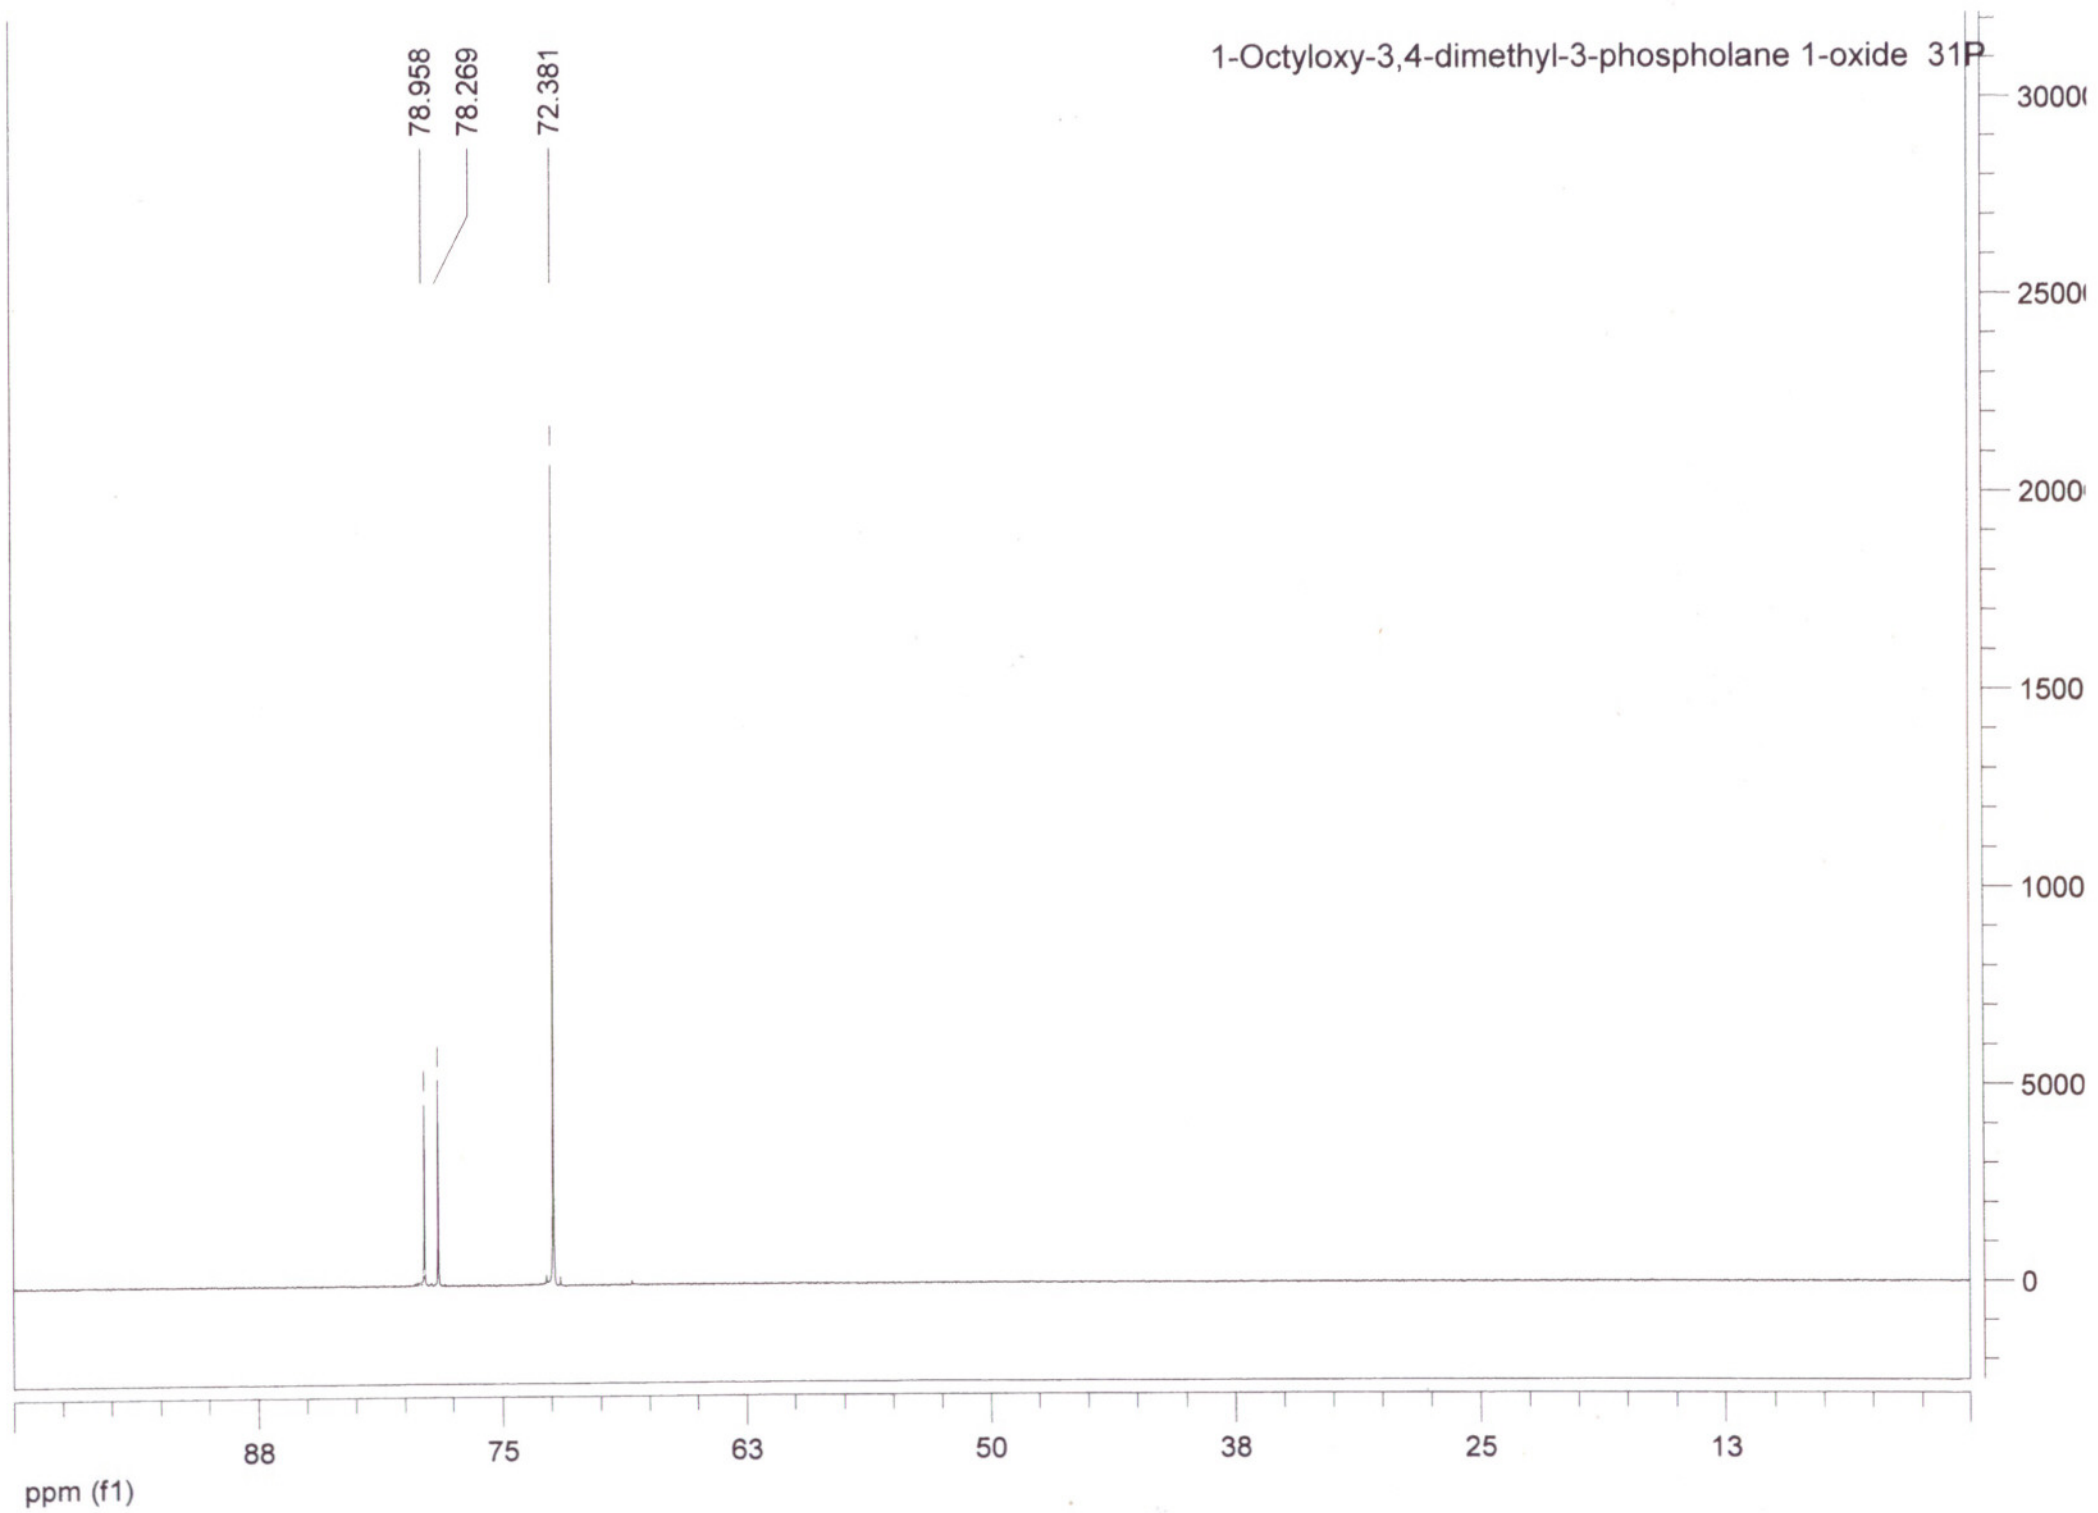

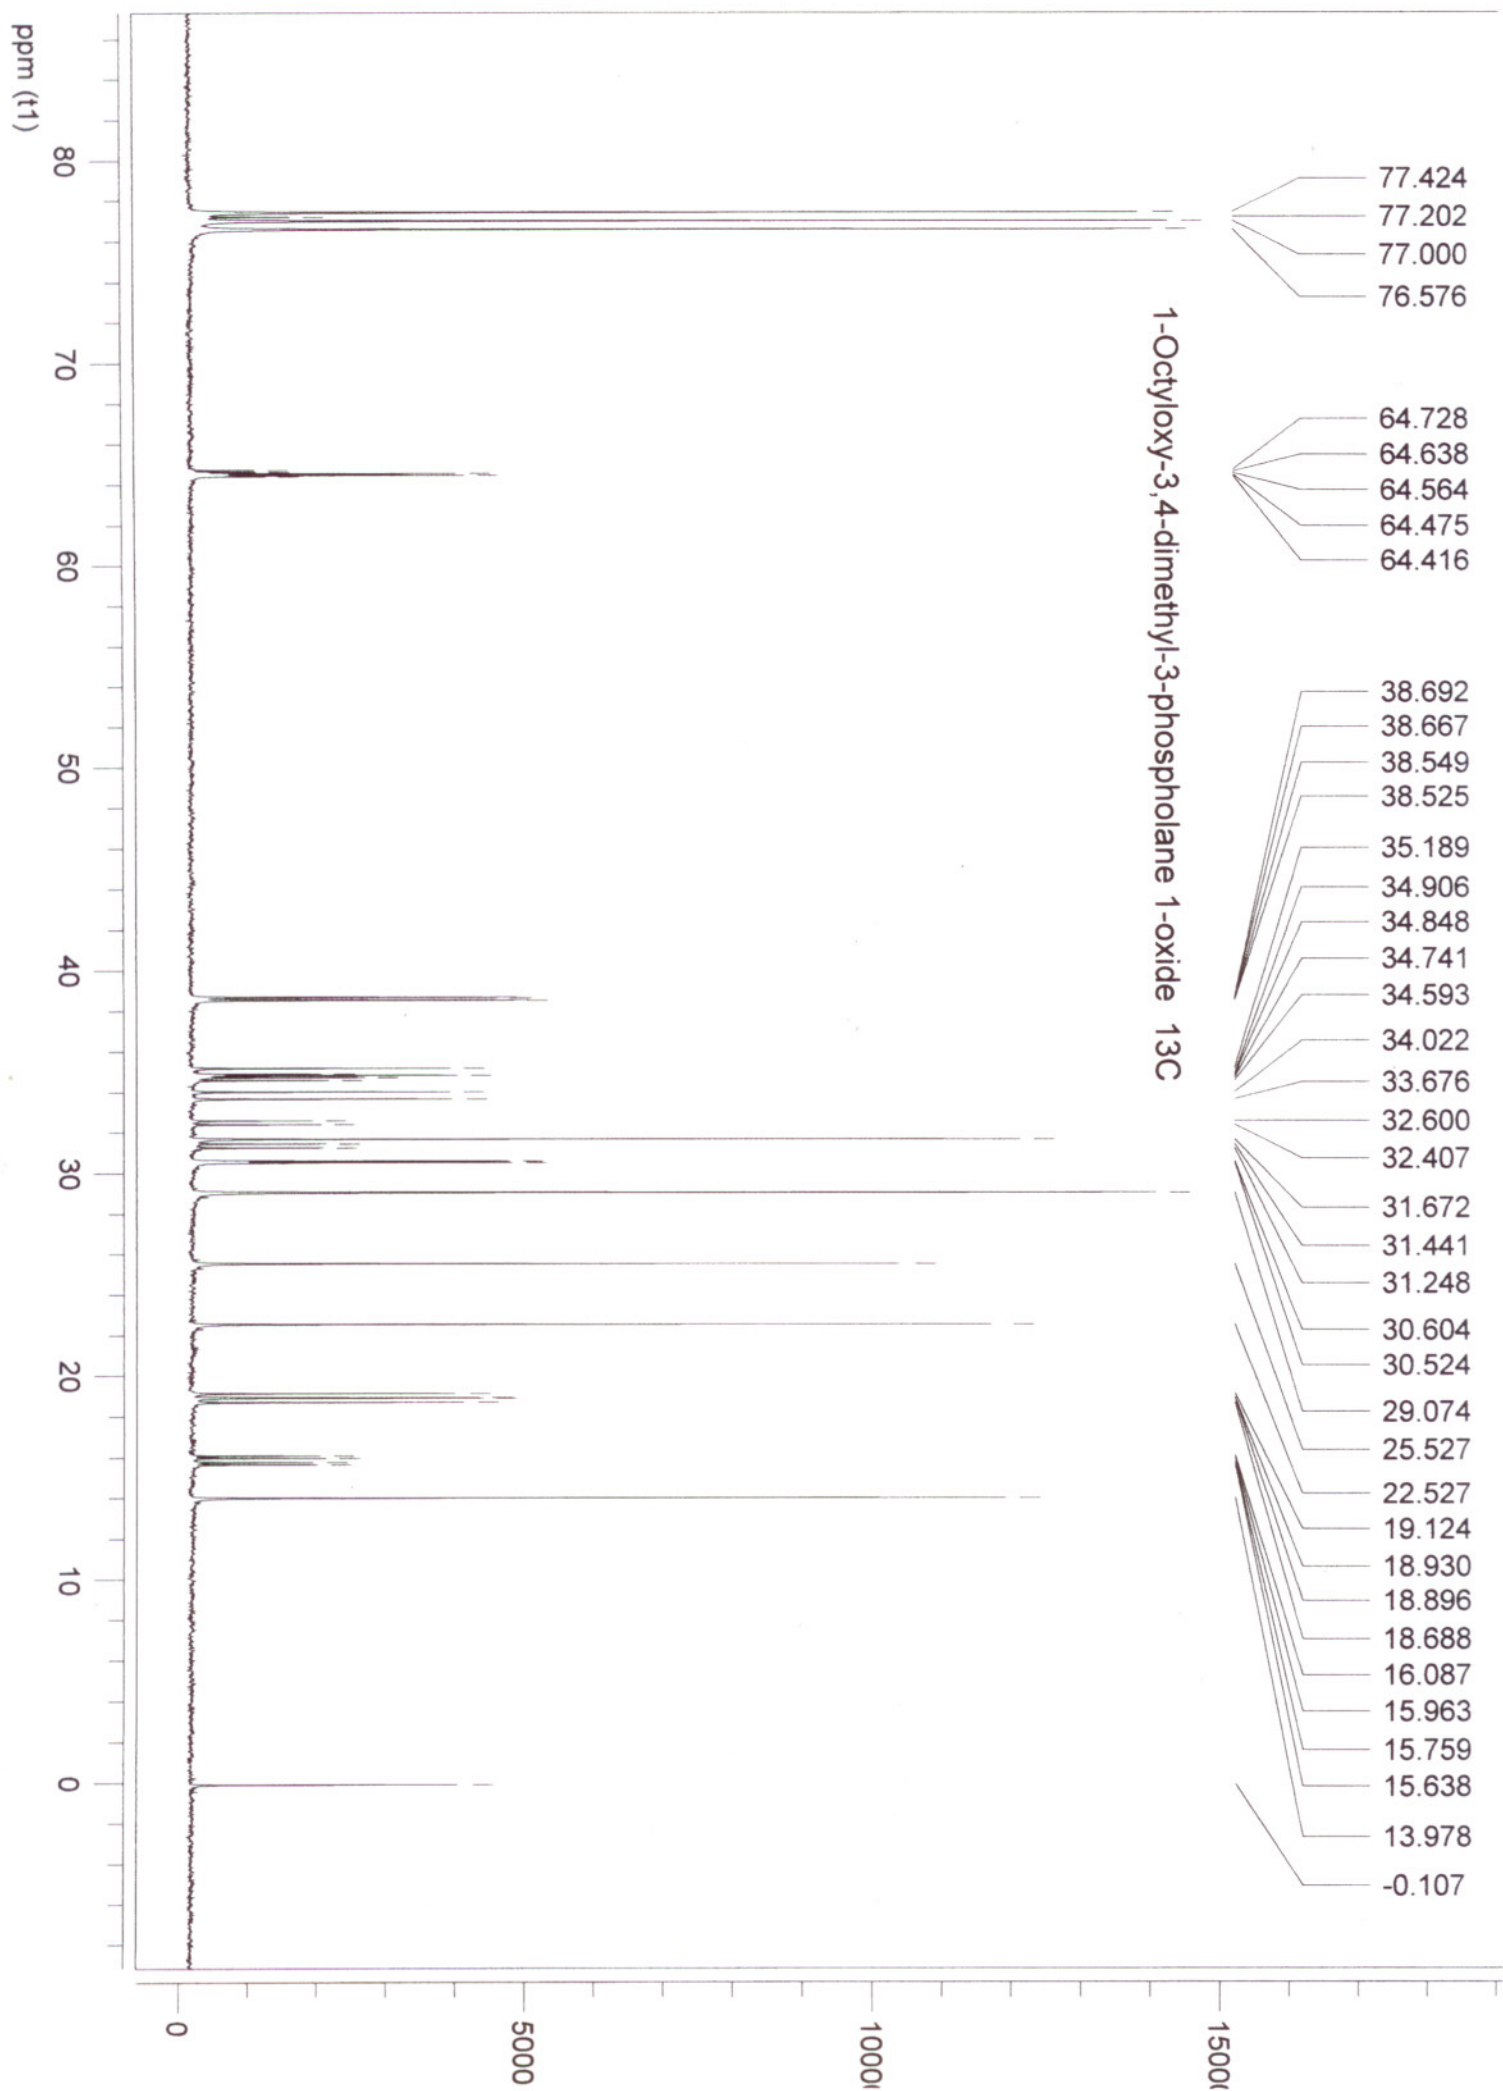

1-Octyloxy-3-methyl-3-phospholane 1-oxide 31P

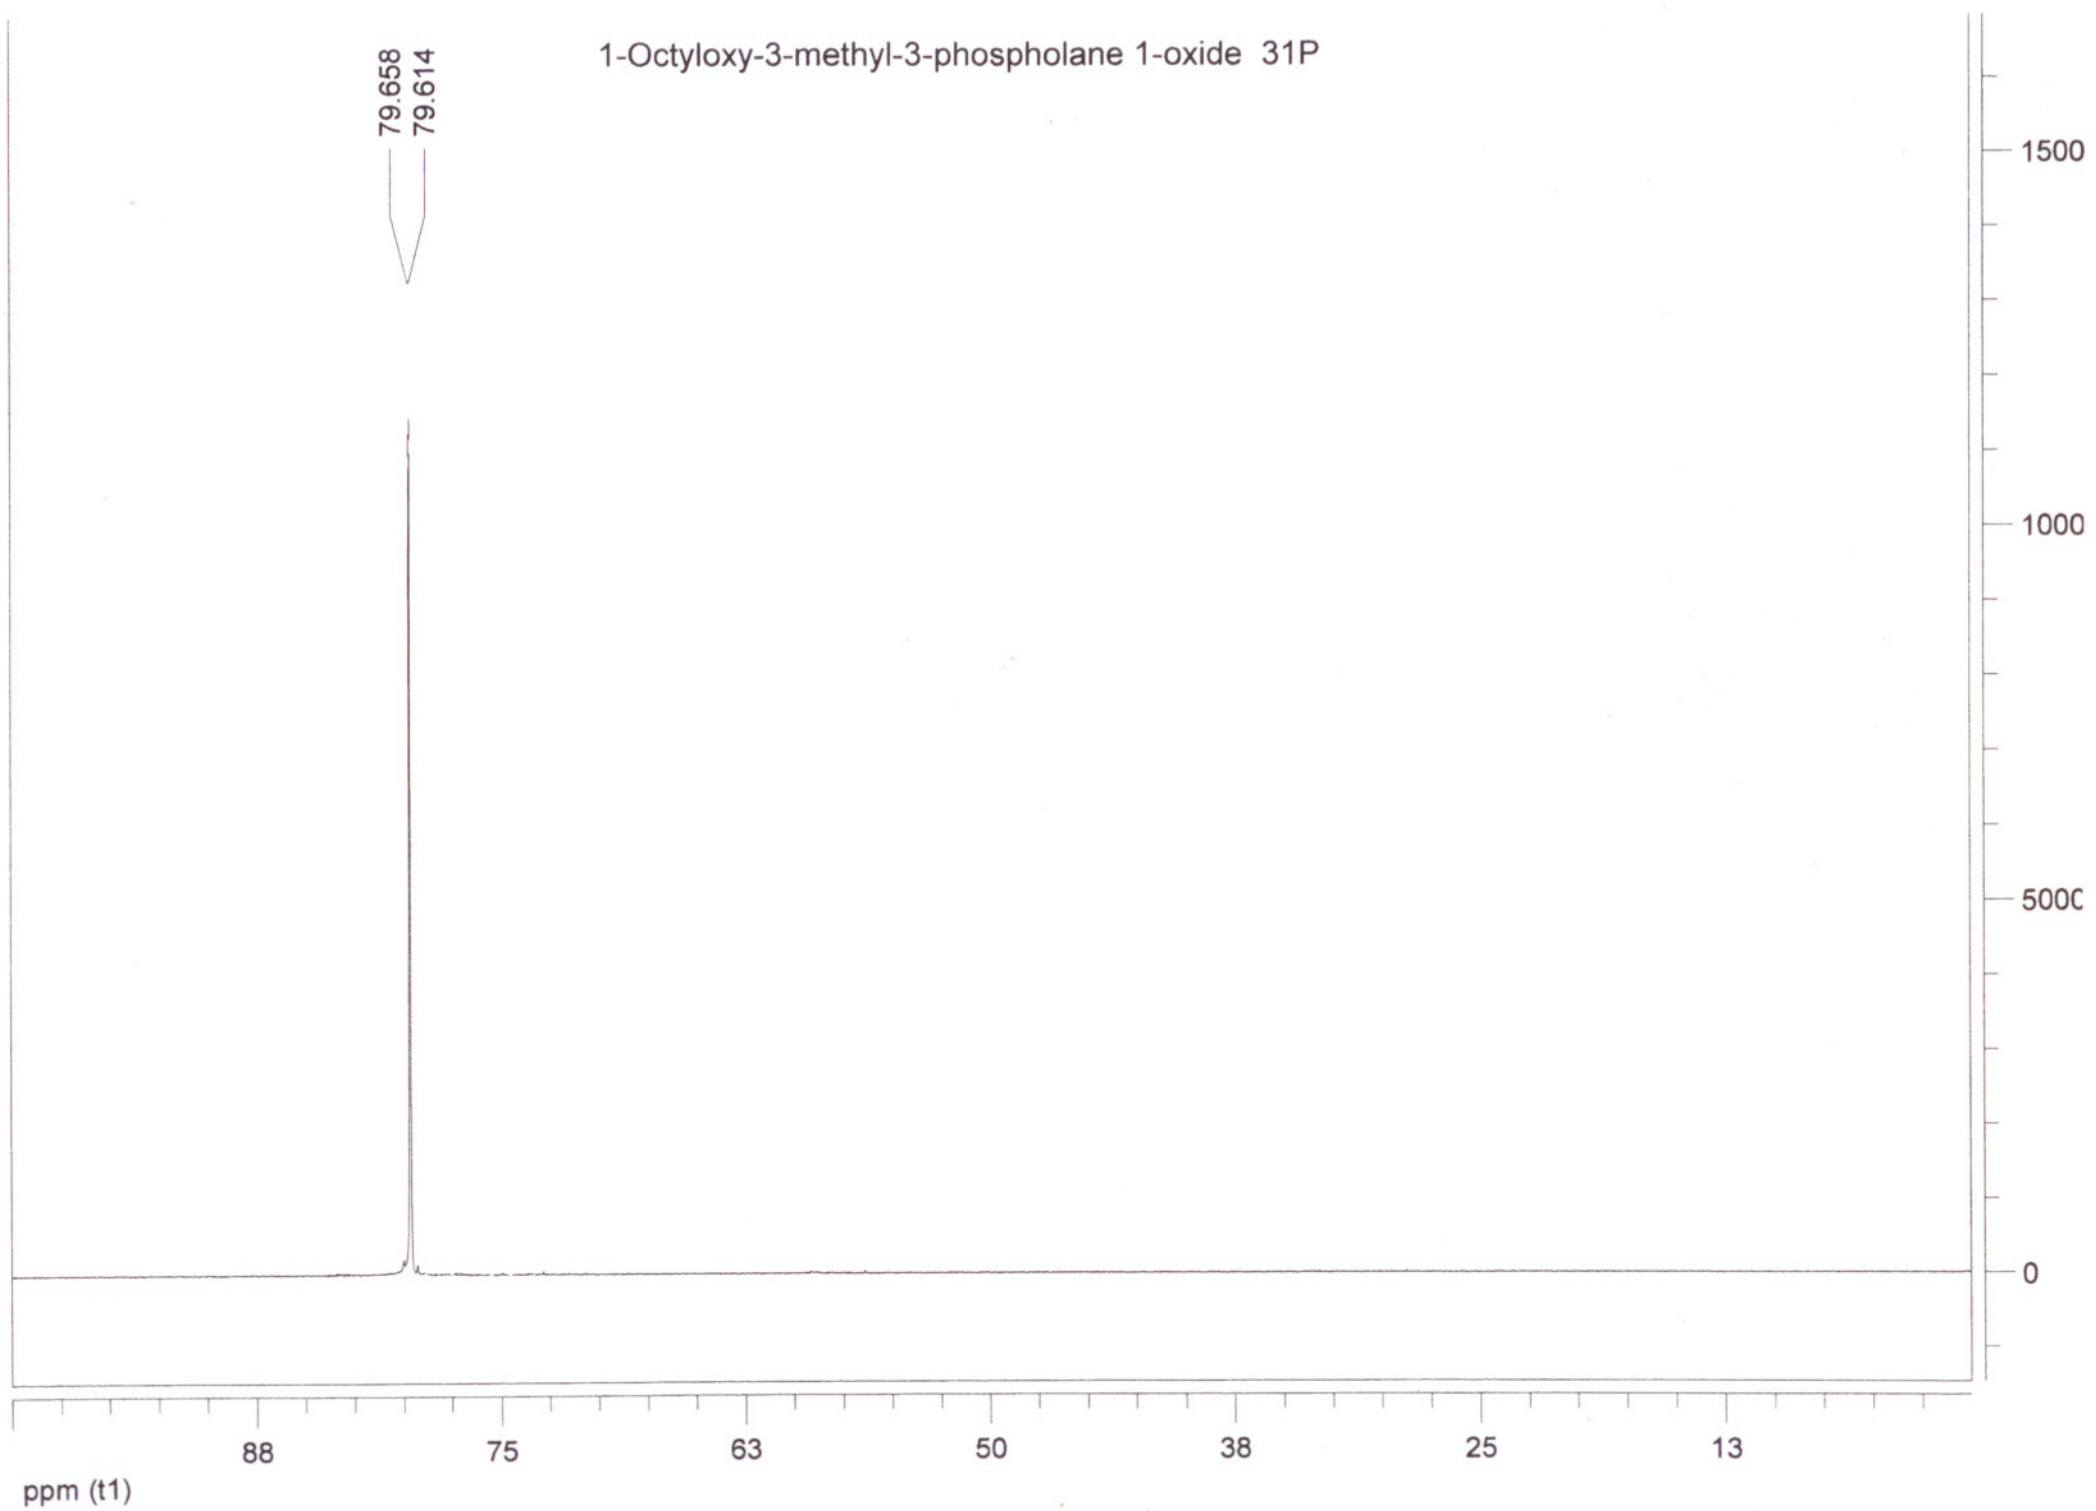

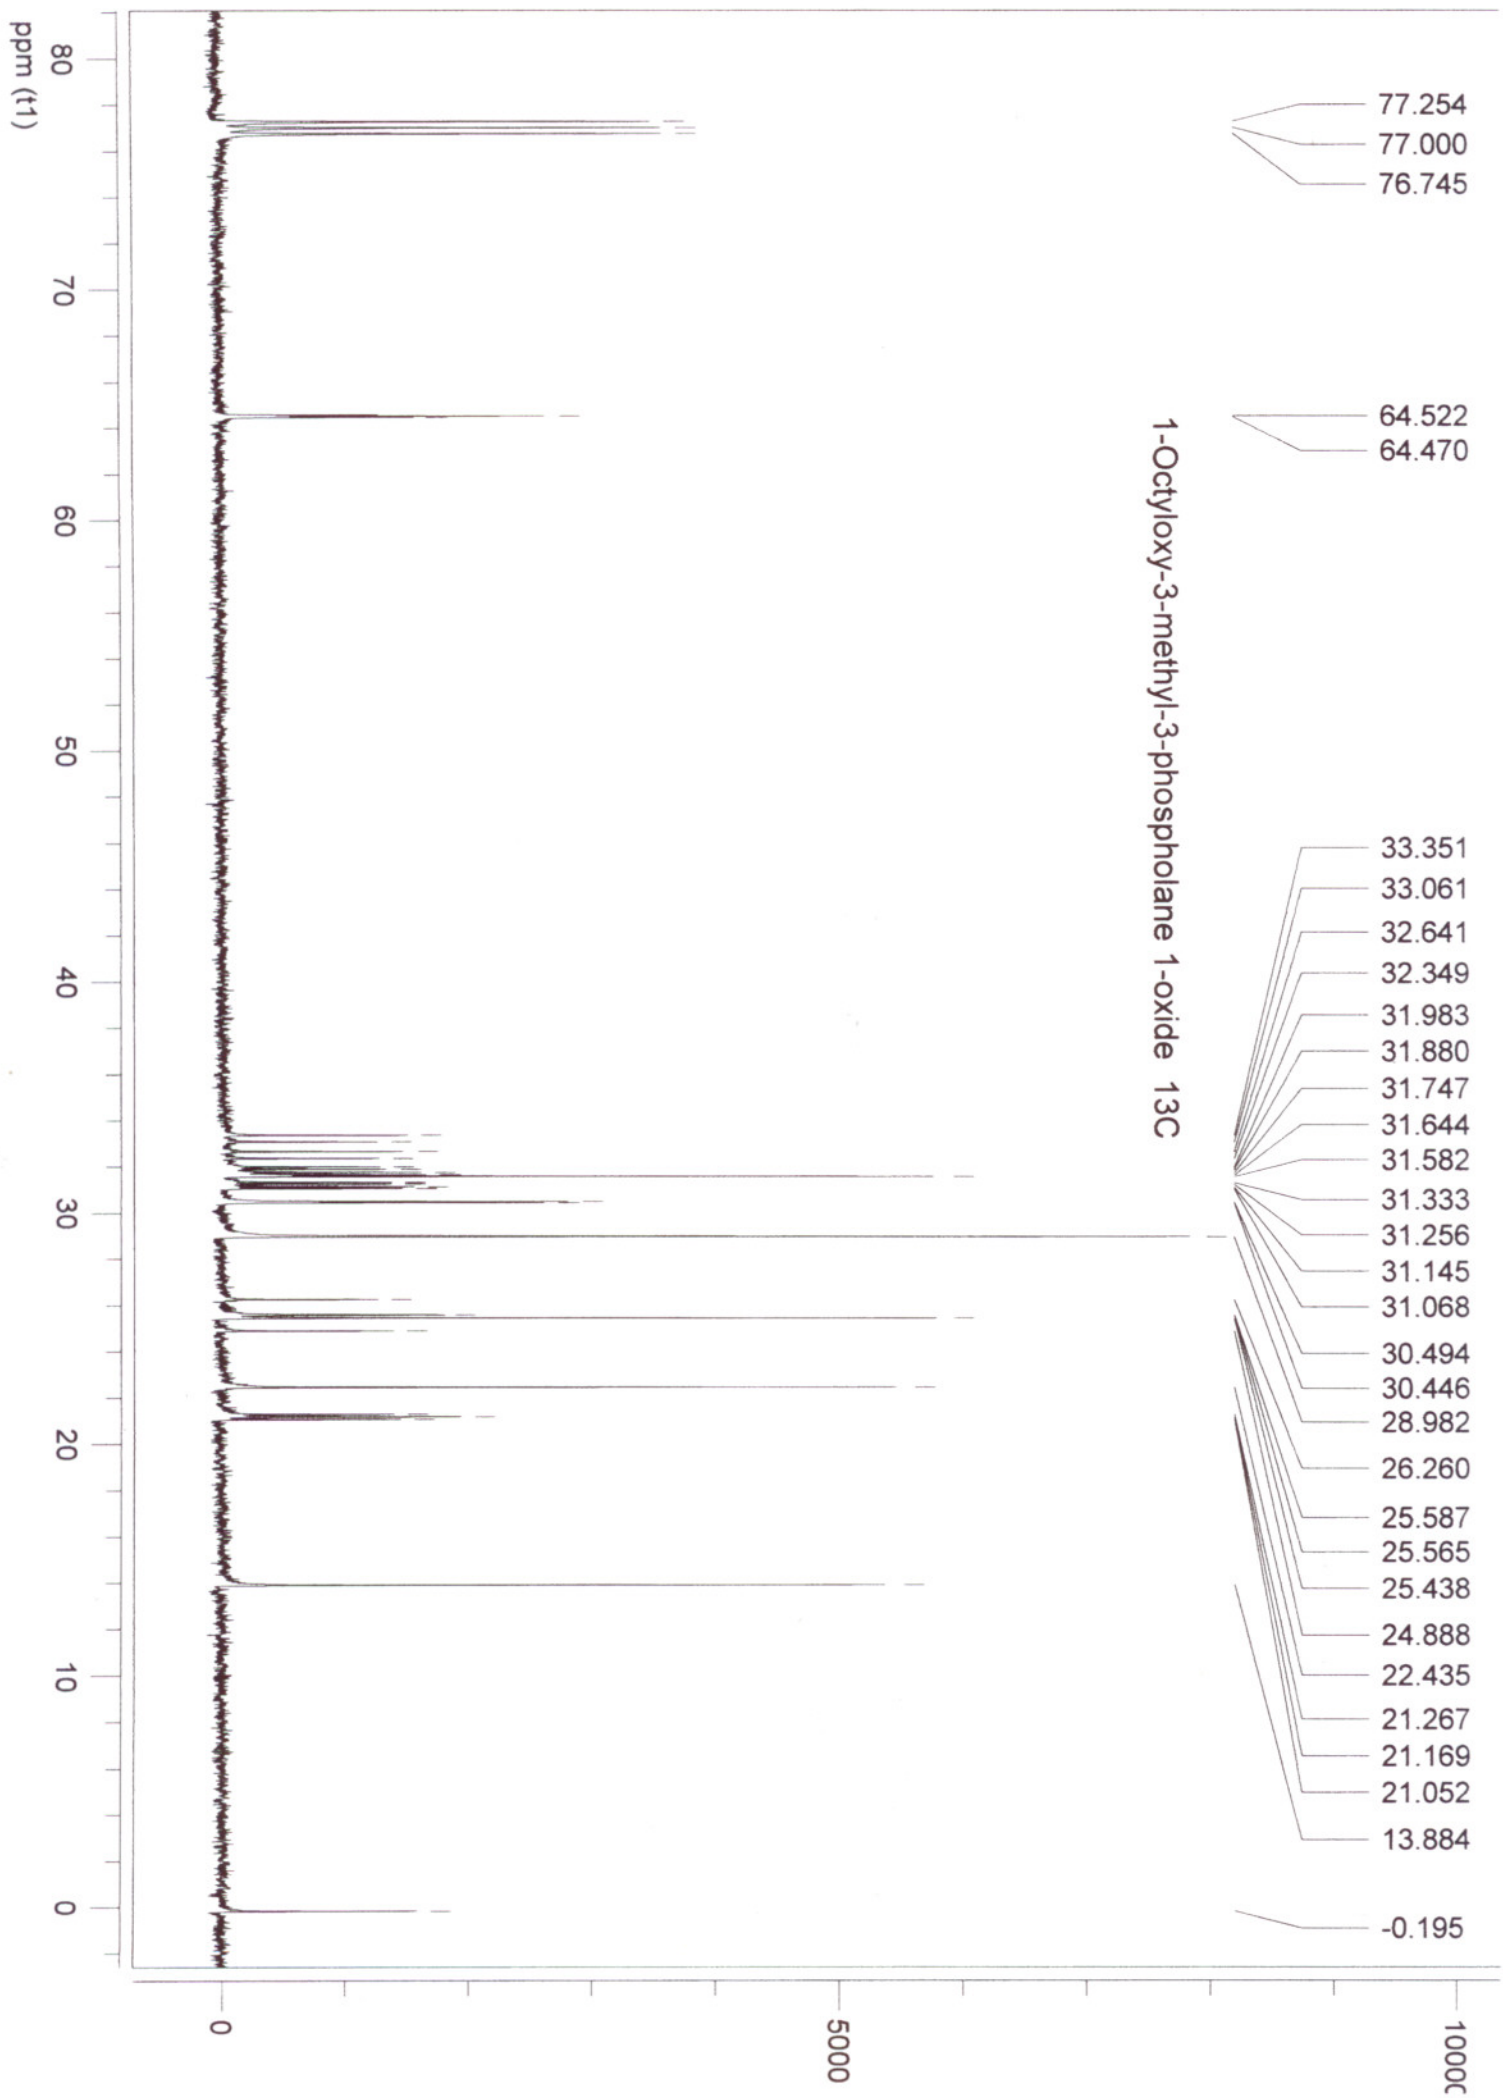

Supplement: c2ob06972e.pdf [file c2ob06972e.pdf]
